# Supplementary material for: Contributions to a neurophysiology of meaning: the interpretation of written messages could be an automatic stimulus-reaction mechanism before becoming conscious processing of information
Source: PeerJ. 2015 Oct 27;3:e1361. doi: 10.7717/peerj.1361 (PMC4627920; doi:10.7717/peerj.1361)
Supplement: Supplemental Information 2 — This file presents our raw data and consists of 8 MS Excel Sheets (one for each question or item) containing the transcriptions of all the 102 questionnaire we collected. The information provided through this file fully corresponds to the answers handwritten by participants on the paper questionnaires. The source filled paper questionnaires are stored and conserved in our archive. [file peerj-03-1361-s002.xls]

## Sheet: Disaggregation data
ARPA-Firenze * Gruppo ALBERT / Ricerca 2009
N°	Età	Sesso	Studi	Attività svolta	NOTE
1	B	F	C	Formatrice
2	A	F	B	Studentessa laureanda
3	D	M	C	Insegnante
4	C	F	C	Coordinatrice pedagogica servizi prima infanzia
5	C	F	B	Imprenditrice
6	B	F	C	Addetta alle vendite
7	D	M	B	Direttore tecnico azienda privata
8	D	M	C	Tecnico Azienda privata
9	D	F	B	Amministrazione in azienda privata
10	B	M	B	Contabilità analitica gestione del sistema qualità
11	C	M	B	Geometra direttore tecnico attività produttiva privata
12	C	F	B	Impiegata amministrativa privata
13	B	M	B	Amministrazione,controllo gestione,contabilizzazione ambito privato
14	C	M	B	Resp.gest.operativa ed amm.va (in parte)
15	A	F	C	Studente specialistica
16	A	M	C	Lavoratore
17	A	F	B	Studentessa universitaria
18	A	F	C	Stundete universitario
19	A	F	B	Studentessa universitaria
20	A	M	B	Laureato
21	C	M	C	Dirigente aziendale
22	B	M	B	Impiegato/Trader
23	A	F	B	Studentessa
24	A	M	B	Cameriere
25	B	M	B	Impiegato
26	D	M	B	Impiegato
27	A	F	C	Giornalista
28	D	M	C	Consulente
29	A	F	C	Specializzanda
30	A	M	B	NR
31	A	F	C	Studentessa di laurea specialistica
32	A	M	B	Studente
33	B	F	C	Odontoiatra
34	A	M	B	Studente
35	C	M	C	Grafico
36	A	F	C	In preparazione dell'esame di Stato (Albo Psicologia)
37	B	F	B	Tecnico di laboratorio qualità
38	A	F	B	Impiegata
39	B	F	C	Impiegata pubblica amministrazione
40	D	F	A	Artigiana C/T
41	A	F	C	Studente
42	A	F	C	Studente
43	A	F	C	Studente
44	A	M	C	Studente
45	A	F	C	Studente
46	A	F	C	Studentessa laurea specialistica
47	B	F	C	Studentessa
48	A	F	C	Studente
49	A	F	B	Studentessa laurea triennale
50	A	F	C	Specializzanda
51	A	F	C	Tirocinante
52	D	F	C	Architetto controllo gestione amministrazione
53	C	F	B	Impiegato amministrativo
54	D	M	C	Insegnante/ libero professionista
55	D	F	C	Professionista della sanità
56	D	M	C	Impiegato
57	D	F	C	Professionista della sanità
58	A	F	C	Film maker
59	C	F	C	Formatrice e consulente professionista.
60	A	F	C	Studentessa laurea specialistica
61	B	F	C	Impiegata, responsabile acq
62	D	M	C	Insegnante
63	B	F	D	Sales manager con master
64	C	M	A	Consulente
65	C	F	A	Commerciante (negozio di abbigliamento)
66	C	F	B	Impiegata contabile
67	A	F	C	Studente
68	C	M	C	Architetto
69	C	M	B	Responsabile di reparto (alimentari)
70	B	M	B	Parrucchiere
71	B	F	A	Barista
72	C	F	B	Operaia
73	B	F	C	Visual Merchandiser
74	A	F	B	studentessa di R.P. aziendali
75	B	F	D	Insegnante di lettere	dottorando
76	B	F	B	NR
77	B	M	B	Impiegato
78	B	F	B	Impiegata
79	A	F	B	Laureanda in psicologia
80	A	F	C	Studentessa laurea specialistica
81	A	F	C	Counselor-psicologa
82	A	M	C	In cerca di occupazione
83	A	F	C	Studentessa laurea specialistica
84	B	F	D	Avvocato	master
85	B	M	B	Libero professionista
86	A	F	D	In cerca di lavoro
87	A	M	D	Studente
88	A	M	B	Studente
89	A	F	D	In cerca di lavoro
90	A	F	B	Imprenditrice
91	B	M	C	Infermiere
92	A	F	B	Impiegata
93	B	F	B	Impiegata
94	B	F	B	Studentessa/ Lavoratrice part-time	Laureanda
95	B	F	C	Impiegata
96	B	M	C	Impiegato
97	B	F	C	Impiegata
98	D	M	C	Dirigente statale
99	B	M	C	Impiegato
100	D	F	C	Insegnante
101	B	M	C	Educatore
102	B	F	C	Libero professionista (tecnico)

## Sheet: Question 1-a
ARPA-Firenze * Gruppo ALBERT / Ricerca 2009
N°	DOMANDA 1-a				NOTE
	Cosa sta accadendo tra XX e YY?
	Risposta	Elementi concreti 1	Elementi concreti 2	Elementi concreti 3
1	Il rapporto è impari: YY è in posizione dominante	YY risponde in 3° persona, come ufficio (autorità ad una richiesta corale,espressa in 2° persona plurale:"ci farebbe piacere"	Uso del condizionale di XX	YY usa l'indicativo
2	Rapporto formale:responsabile lavori-cliente	Registro formale dei messaggi
3	Rapporto cliente-fornitore (di un servizio)	Ci farebbe piacere che(..)un tecnico della ns.Provincia venisse (..)a fare un sopralluogo
4	YY è di un altro settore,ma ha un ruolo superiore di XX	XX:"Egr.Arc.YY"	"ci farebbe piacere"	YY:"Gentile signora XX"
5	Sbilanciato	"La ringraziamo e le porgiamo distinti saluti"	"Distinti saluti"
6	XX chiede ad YY di verificare lo stato dei lavori che si stanno effettuando nella propria sede di lavoro.A XX sembra di avere qualche dubbio sulla buona riuscita dell'intervento, ma YY la rassicura.	XX:ci farebbe piacere che almeno una volta	"verificare lo stato delle cose"	"controllare che i lavori procedono come dovuto"
7	Comunicazione interna tipica enti pubblici	(Lavori di cui sopra)	(verificare lo stato delle cose)
8	Inizia una contestazione ed una insoddisfazione sui lavori da parte di XX	Frasi(rimarcare il numero di gg)
9	Il dipendente chiede un intervento al responsabile dei lavori, o meglio se i lavori procedono come duvuto e fare una verifica.	Verificare lo stato delle cose e controllare se i lavori procedono come dovuto
10	C'è incomprensione perché XX richiede un sopralluogo a YY,mentre YY conferma che il sopralluogo è regolarmente avvenuto	Tecnico nostra provincia venisse qui	Si è provveduto al sopralluogo e i lavori procedono sostanzialmente secondo il cronoprogramma.
11	Una constatazione e eventualmente chiarimenti tra due soggetti rispettivamente per le proprie competenze e responsabilità(comunicazione interpersonale)	XX fa la constatazione di come sono stati svolti i lavori in qualità di dispendente	YY conferma la rporpia responsabilità e chiarisce i dubbi
12	XX sta chiedendo un sopralluogo perché qualcosa non torna.YY cerca di sdrammatizzare ma non risponde alla domanda correttamente.XX non si arrende e porta fatti concreti	Richieste di verifica	Risposte non esaurienti ricevute	Nuovo sollecito
13	XX essendo direttamente interessato,in quanto appartenente all'ufficio oggetto di tali lavori,è molto più coinvolta ed interessata di YY che ha la sua funzione di far si che i lavori si concludano regolarmente rispettando i tempi previsti.	La mancanza di attaccamento al lavoro di YY è evidenziata nella frase"nell'ambito delle proprie funzioni"come dire la ns competenza finisce li
14	Una transazione personalizzata	Tono polemico da parte di XX pur comunque avendo una transazione sostanzialmente giusta.
15	XX espone il problema ma senza far emergere concretamente ciò che non va bene. L'espressione "ci farebbe piacere"introduce un segno di scarsa formalità, invece i controlli dovrebbero essere doverosi.	L'elemento concreto è stata l'espressione "ci farebbe piacere".
16	XX invita YY a verificare lo stato dei lavori nella sede interessata. Nutre qualche dubbio circa la corretta srealizzazione e forse la serietà dei controlli di YY.	"Almeno una volta"	Il modo di esporre è formale e non si intravedono segni amichevoli.
17	Si tratta di una richiesta da paerte di un dipendente nei confronti del responsabile dell'azienda; richiesta, sicuramente posta in maniera sbagliata, nonché formalmente scorretta. Non si capisce ciò che comunica XX a YY.	L'intera e-mail è esposta in maniera completamente sbagliata dall'inizio alla fine, senza presenza di continuità nel discorso(da parte di XX).
18	XX avvia una comunicazione con YY, in particolare XX fa una richiesta (due richieste) e YY da una risposta. Oltre a dare una risposta YY sottolinea il lavoro che sta svolgendo.	Volevamo far presentre-verificare-controllare	Provvede ed ha provveduto-i lavori procedono secondo il cronogramma…
19	Tra XX e YY sta avvenendo uno scambio di parole teoricamente improntato alla risoluzione di un problema di XX	XX ha una necessità di un "sopralluogo" sul posto dei lavori,nonché necessita di un "controllo"
20	Comunicazione relativa a un processo lavorativo.	Sopralluogo	cantiere
21	XX fa richieste imprecise. YY da risposte standard.	XX: verificare stato delle cose
22	Lamentela tra XX e YY e scarico di responsabilità	Ci farebbe piacere che almeno una volta il tecnico della provincia…
23	Discussione in ambito lavorativo	"I lavori stanno procedendo da una quindicina di giorni"	Si chiede di fare un sopralluogo per verificare come procedono i lavori.
24	Richiesta di un tecnico della provincia per il controllo dei lavori, se procedono nel modo migliore.	..Che almeno una volta un tecnico…venisse	…Per…verificare lo statodelle cose
25	XX sembra preoccupato riguardo lo svolgimenento dei lavori e chiede urgentemente un sopralluogpo del responsabile.	La frase "almeno una volta" sembra provocatoria.
26	Una comunicazione in modo tale che alcuni lavori che si tanno svolgendo presso uno stabile pubblico vengano effettuati nella maniera più corretta.	far venire un tecnico per il controllo dei lavori,comunicare i difetti rilevati "imprecisioni".
27	Contenzioso su impianto riscaldamento	Tono usato nello scambio messaggi	Modo in cui viene esposto il problema
28	Un fraintendimento	Prima XX chiede un sopralluogo poi parla dei difetti specifici
29	Si stanno effettuando lavori all'impianto di riscaldamento dell'ala B dell'edificio. Il soggetto XX chiede all'arch. YY che un addetto tecnico della provincia vada ad effetuare un sopralluogo.	i lavori procedono	un tecnico della ns Provincia venga a fare un sopralluogo.
30	Richiamo da parte di XX e colleghi all'arch.YY	"Ci farebbe piacere che almeno una volta un tecnico della ns Provincia venisse qui"
31	C'è uno scambio di informazioni circa un lavoro di climatizzazione e una critica al lavoro stesso per mancanza di professionalità.	Fare un sopralluogo e verificare lo stato delle cose	Farei vedere alcune "imprecisioni"	La ditta dovrebbe eseguire il lavoro a "regola d'arte".
32	La signora XX vuole sincerarsi che i lavori stiano procedendo in maniera corretta, lavori condotti da YY	Il soggetto YY è un architetto;	Il soggetto XX parla di lavori in un palazzo.
33	La sig.ra XX richiama l'attenzione dell arch. YY su un cantiere che dovrebbe dirigere ma del quale forse non si sta occupato come dovrebbe.	"Le volevamo far presente"	"Fare un sopralluogo e verificare…"
34	Vi è una richiesta di scambio di informazioni e richieste.	Ci ferebbe piacere che almeno una volta;	Provvede ed ha provveduto regolarmente ad eseguire sopralluoghi.
35	Normale discussione.	Sopralluogo	Dovuto	Dubbi
36	XX fa una richiesta a YY e presenta una situazione. YY fornisce informazioni ad XX.	Le volevamo far presente…	Provvede ed ha provveduto…	Ci farebbe piacere che un tecnico venisse; i lavori procedono…
37	XX chiede chiarimenti per visita di controllo per sopralluoghi.YY risponde che è tutto regolarmente svolto	Almeno una volta un tecnico della Ns Praov. Venisse qui..	I lavori procedono sostanzialmente secondo il cronogramma prestabilito.
38	XX aspetta dei chiarimentisui lavori svolti dall'ufficio di YY.	XX:"ci farebbe piacere che almeno un tecnico della ns provincia venisse qui".
39	Comunicazione dell'avvio dei lavori e richiesta di fare sopralluoghi da parte dei tecnici del riscaldamento nel palazzo ala B.	Avvio lavori da 15 gg.	Sopralluoghi.	Ala B del palazzo.
40	Sta avvenendo uno scambio di mail iniziato da XX perché la ditta che sta eseguendo i lavori effettui dei controlli.	Richiesta di un sopralluogo e verifica lo stato delle cose.
41	Una diatriba su dei lavori che dovrebbero essere svolti da YY	imprecisioni	lavori a "regola d'arte"
42	XX ed YY si stanno scambiando pareri divergenti riguardo al più o meno corretto svolgimento di controlli riguardo a lavori per l'impianto di riscaldamento.	La frase di XX:"…ci farebbe comunque piacere che…" sembra un modo ironico per dire:"potreste almeno venire a vedere".
43	XX si sta rivolgendo ad YY per chiedere di inviare un tecnico della Provincia per fare un sopralluogo e certificare lo stato dei lavori di montatura di un impianto di riscaldamento.	Tecnico; sopralluogo.	Area di cantiere.	Verificare lo stato delle cose.
44	XX chiede"gentilmente" chiarimenti sul lavoro svolto e entrambe le parti almeno nel primo mex. Sembravano aver raggiunto l'accordo. Nel secondo mex. Sembra che XX sia un po’ disturbata dal lavoro "mal" svolto.	XX: che almeno una volta un tecnico venisse;	Alcune "imprecisazioni"
45	XX cerca gentilmente di far capire ad YY che probabilmente qualcosa nei lavori potrebbe non andare bene.	NR
46	Nel mess1 XX segnala ad YY la necessità di un controllo dei lavori all'interno della struttura; nel mess2 YY informa XX dell'effettivo svolgimento dei controlli.	1°mess:"ci farebbe nel contempo piacere, che almeno una volta…"	2°mess:"l'ufficio direzione…provvede ed ha provveduto regolarmente…"
47	Ci sono dei messaggi in cui viene richiesto un sopralluogo per dei lavroi e l'architetto risponde che il suo ufficio provvede già ad eseguirli.	"Un tecnico della ns Provincia venisse all'ala B"	"Ufficio direzione provvede ad eseguire soprralluoghi"
48	Ci sono dei presunti problemi riguardo dei lavroi a impianti di climatizzazione.	"Ci farebbe piacere che almeno una volta un tecnico della ns Provincia venisse a fare un sopralluogo…"	"Se potesse passare dal mio ufficio…le farei vedere alcune imprecisioni…che devono essere aggiustate…"	"La ditta dovrebbe eseguire il lavoro a regola d'arte…"
49	Si scambiano informazioni sui lavori di climatizzazione tra dipendente e responsabile.	Si può notare dall'intestatario e dal mittente della mail, nonché dal contenuto delle mail stesse.
50	Si sta pensando di comunicare la propria differente concezione di come un lavoro di climatizzazione debba essere svolto e quali parametri debba rispettare.	"La ditta dovrebbe eseguire i lavori a regola d'arte".	"I lavori procedono secondo il cronogramma prestabilito".
51	Il dipendente segnala al responsabile un ritardo o inefficienza nei lavori sul climatizzatore. Il responsabile le risponde che è tutto regolare.	"I lavori di cui sopra stanno procedendo da 15gg…che almeno una volta…verificare….controllare se procedono come dovuto".	"Provveduto regolarmente".
52	I lavoro procedono senza che XX abbia evidenza che qualcuno venga a controllarli nell'ala B.	Ci farebbe piacere che "almeno una volta" un tecnico venisse.
53	Si tratta di una segnalazione (da parte della signora XX) di un ipotetico disservizio ad un referente che non riessce a cogliere a pieno il senso del messaggio.	"Che almeno una volta…"	"…verificare lo stato…"indicano il bisogno di far notare l'assenza/mancanza di controlli/verifiche che XX invece ritiene necessari.
54	Uno scambio dei messaggio sullo stato dei lavori in un intervento di natura tecnica.	Tecnico/sopralluogo/ufficio direzione lavori	Cantiere/impianto di riscaldamento	Lavoro a regola d'arte/fan coils/ecc…
55	Conflitto sotterraneo.	"Almeno una volta un tecnico"…etc	"Se il lavoro fosse stato fatto a casa mia"…etc etc
56	Sta iniziando un contenzioso.	Il tono della comunicazione.
57	XX richiede una presenza, un interlocutore diretto che per ora non ottiene.	"Ci farebbe piacere che un tecnico venisse"
58	XX sta porgendo una lamentela presso la ditta di YY.Chiede inizialmente solo che vengano effettuati controlli, ma si caqpisce che ha già dei dubbi. In seguito la lamentela è più esplicita.	Il tono di XX è veramente aggressivo-sarcastico:"Ci farebbe piacere","almeno una volta".	L'uso delle virgolette su "imprecisioni" e "aggiustate", "regola d'arte".	Il riferimento al denaro pubblico e al fatto che la ditta è pagata per quello che fa.
59	Un tentativo- seppur mascherato da toni formali- di affermare il proprio potere di ruolo sull'altro.	1)Tono formale di entrambi i messaggi.	2)Formule di cortesia ripetute più volte.	3)Precisazione netta del ruolo di chi controlla(XX) e di chi sostiene di aver controllato (YY).
60	XX sta chiedendo conferma delle conformità dei lavori eseguiti per conto di YY	Sopralluogo	Verificare	Controllare
61	X X vuole fare presente a YY delle imperfezioni del lavoro fatto dalla ditta di YY	"alcuni dubbi","imprecisioni".	"non ben inserita","posizionate un po storte"
62	Un sopralluogo sul luogo di lavoro, affinchè tale lavoro possa avvenire bene.	" Venisse nell'ala B per fare un sopralluogo( da parte di XX )	"L'ufficio direzione … provvede ed ha provveduto a eseguire i sopralluoghi"( da parte di Y)
63	I due interlocutori non sono aggiornati dai loro uffici.	…lavori…che almeno una volta…come dovuto	…provvede ed ha provveduto…cronogramma prestabilito.
64	Richiesta d'intervento e verifica.	Lettura dei msg 1 e 2.
65	risponde di aver verificato. Per me invece non è successo.	Il sig.YY non ha specificato né ora né luogo del presunto controllo.
66	Stanno comunicando. XX richiede sopralluogo. YY non lo vuole fare.	Non più tardi di ieri.
67	La signora XX si lamenta che non ci sia stato nesssuno a controllare i lavori come stanno procedendo da una quindicina di giorni e il signor YY le risponde che invece ci sono stati senza però specificare quando.	Perché YY non ha specificato quando il tecnico era stato a controllare.
68	XX si appresta a richiedere info inerenti lo svolgimento di lavori di climatizzazione in provincia.	Il tono di richiesta.
69	Discussione tra un impiegato della provincia e l'architetto che dovrebbe dirigere i lavori.	Il primo messaggio di XX con richieste di controlli nella sede dei lavori e la risposta dell'architetto.
70	XX richiede un sopralluogo ad YY a causa di dei lavori presumibelmente effettuati non correttamente	Da"provincia" a "dovuto"
71	Tra i 2 sogetti sta accadendo uno scambio di mail in cui si individua un problema:il controllo dei lavori di climatizzazione	Provincia	Sopralluoghi.	Ala B del palazzo.
72	Uno scambiodi email dove XX richiede sopralluoghi	Si parla di ddei lavori che stanno svolgensdosi in provincia
73	La signora XX si accinge tramite mail a richiedere la supervisione dei lavori che stanno avvenendo in provincia	Da"che almeno una volta" fino a "dovuto"
74	XX e YY si stanno accordando riguardo il procedere di alcuni lavori presso la sede interessata e la dipendente stessa richiede un sopralluogo di un loro tecnico.	I lavori…un tecnico della ns. Provincia…sopralluogo e verificare lo stato delle cose.
75	Uno scambio di mail relativo alla richiesta di sopralluogo al fine di verificare la corretta installazione di impianti di riscaldamenti	Da"ci farebbe" fino a "cose"
76	La sig.ra XX chiede più controlli sui lavori che l'azienda YY stafacendo;La sig.ra Xx esprime dei dubbi sulla qualità dei lavori	Lavori che stanno procedndo da 15 giorni
77	XX richiede una verifica di controllo che è confermata da YY ma non nella persona richiesta da XX	Ci farebbe piacere	Almeno una volta un tecnico della nostra provincia	Ufficio direzione lavori
78	XX non si sente sufficientemente tutelata durante i lavori e trova evidentemente scarso il controllo che la direzione dei lavori esercita sulla ditta che li segue	Ci farebbe piacere che almeno una volta	Controllare se i lavori procedono come dovuto
79	Stanno discutendo circa dei lavori all'impianto di riscaldametno, che secondo XX non sono stati compiuti in modo adeguato	Il tono in cui vengono esposti gli argomenti è alto, infatti si nota che entrambi tendono a ribadire le proprie idee
80	Richiesta di attenzione da parte di XX e espressione di fastidio e disaccordo da parte di YY	XX:che almeno una volta; YY:nell'ambito delle proprie funzioni	XX: procedono come dovuto; YY :ultimi due non più tardi di ieri
81	Scambio di comunicazioni in merito al procedere di lavori in atto con posizioni contrastanti	Lavori
82	Xx pone le sue lamentele al responsabile dei lavori	ci farebbe nel contempo piacere che almeno una volta un tecnico
83	Ra pporto di lavoro con visione contrapposta sullo svolgimento	Piacere; da una quindicina di giorni;verificare e controllare come dovuto	Provveduto regolarmente non più tardi di ieri	Cronogramma stabilito (2 mesi)
84	Hanno una comunicazione apparentemente tranquilla ma con segnali di latente sfiducia da una parte e sopportazione dall'altra	Richiesta di intervento di tecnico "di parte" (X)	Risposta che non apre al sopralluogo da parte di terzi (Y)
85	Richiesta disponibilità del responsabile lavori a concedere al tecnico della provincia sopralluogo per verificare la qualità del lavoro	tecnico nostro provvede per verificare lo stato delle cose
86	XX chiede a XX maggiore controllo sullo sato dei lavori. XX sottolinea in questo modo lo scarso interesse del responsabile per i lavori , mentre YY risponde che i controlli sono avvenuti	Nelle parole di XX c'è sarcasmo ( ci farebbe nel contempo piacere) ….	[Nelle parole di XX] c'è un certo tono di rimprovero (almeno)	...mentre YY esprime sicurezza
87	Mancato allineamento delle conoscenze sullo stato dei lavori	"XX:farebbe nel contempo piacere che almeno una volta…"	"YY: provvede ed ha provveduto regolarmente.."
88	Si sta svolgendo una discussione inerente allo stato di un lavoro che YY deve svolgere per la ditta in cui lavoraXX, ma che non procede secondo i piani	"…almeno uns volta un tecnico…"	" ..per fare un sopralluogo…"
89	XX sta cercando un modo diplomatico di far notare a YY che i lavori non sono stati svolti come previsto	"imprecisioni"	"riconoscendo di poca importanza"	"aggiustate"
90	Attriti personali:ognuno ha la ragione pensando che l'altro sia in errore	Che almeno una volta	nonché controllasse [are]	provvede ed ha provveduto
91	Accade che il Sig. YY non vuole ingerenze nel lavoro che ha "commisssionato" e di cui credo sia responsabile, mentre XX ritiene doveroso e "onesto" richiedere dei controlli	ci farebbe piacere..verificare lo stato delle cose	le ultime due..ieri
92	XX non ha fiducia nei lavori di YY. YY risponde cordilamente a XX	"controllare che i lavori procedano come dovuto"	sopralluoghi e verifiche non più tardi di ieri
93	si stanno scambiando e-mail per aggiornarsi sull'avanzamento dei lavori	vedere alcune imprecisioni	se il lavoro fosse stato fatto a casa mia	essendo denaro pubblico
94	XX lavora in una sede dove YY gestisce dei lavori di (?) ristrutturazione dell'impianto di climatizzazione. XX non è sicuro del buon andamento dei lavori e tornato dalle vacanze trova conferma dei suoi dubbi	Le volevamo far presente…da una quindicina di giorni	Almeno una volta un tecnico della nostra provincia	far presente alcuni dubbi
95	Anche YY sta procedendo con i lavori per un impianto di riscaldamento nell'ala B del palazzo in cui lavora la Sig.ra. XX; la Sig.ra. XX fa presente alcune "imprecisioni" del lavoro e chiede aggiustamenti.	Oggetto e mittente e distinatario delle mail	le volevamo fare presente	Verificare lo stato delle cose.
96	YY deve condurre dei lavori di climatizzazione presso la sede in cui lavora YY.	mittente e ricevente dei messaggi
97	si scrivono della e-mail per lavoro	Dei A: CC: Formule di apertura; chiusura, messaggi.
98	controllo su un impianto di riscaldamento/condizionamento su un fabbricato	la richiesta di sopralluogo
99	niente	ognuno parla oper sé e rimane sulla sua posizione
100	chiarimento	far presente
101	XX chiede a YY di "aggiustare" un lavoro non eseguito a "regola d'arte" negli uffici in cui XX è impiegata	la parte sottolineata [ poiché ero in ferie… pagata per questo.]
102	XX vuole essere sicura che i lavori procedano e vengano svolti a regola d'arte e incalza YY, il responsabile, a controllare; quest'ultimo cerca di risolvere molto rapidamente la questione.	XX cita dei sopralluoghi da fare, YY dice di averli regolarmente eseguiti e aver verificato, XX risponde con delle osservazioni tra virgolette.

## Sheet: Question 1-b
ARPA-Firenze * Gruppo ALBERT / Ricerca 2009
N°	DOMANDA 1-b				NOTE
	Come definirebbe la posizione di XX nell'interazione?
	Risposta	Elementi concreti 1	Elementi concreti 2	Elementi concreti 3
1	Propositivo,rispettoso ruoli,si pone in una posizione di "dipendenza dall'altro"	Propositivo:ci farebbe nel contempo piace..controllare che	Rispettoso ruoli:uso della 2°persona plurale e il mette un collega per conoscenza; Egregio Arch.	Posizione "down": almeno una volta
2	Dipendente presso la sede interessata dai lavori,ha il diritto e il dovere di segnalare problemi e/o imperfezioni	Definizione tra parentesi di XX alle voci mittente e destinatario nei due messaggi	Si accenna ad un tecnico della provincia.	Fa intuire che si tratti di denaro pubblico
3	XX fornisce un'informazione e fa una richiesta a YY con tanto di cortesia.	La prima frase fornisce l'informazione	Il resto della comunicazione è dedicato alla richiesta.	"Ci farebbe piacere…" = tono di cortesia
4	Soggetto subordinato a YY e che nel fargli una richiesta la formula come richiesta di piacere, non ha il ruolo per chiedere formalmente.	"ci farebbe piacere"	"la ringraziamo"
5	Non professionale eccessivamente amichevole con assenza di rif.tecnici	L'esposizione è colloquialenon tecnica personalizzata
6	Scettica sulla qualità dell'intervento	Stessi elementi della risposta 2
7	Di sfida ma con menefreghismo	(Le volevo far presente)
8	Critica e infastidita	Richiesta di sopralluoghi per controllo lavori
9	Un sollecito per avere un buon funzionamento dell'impianto di riscaldamento	NR
10	Prudente ma scocciato	Ci farebbe nel contempo piacere (visto che non è stato fatto prima)
11	Prudente ma preciso nelle richieste	Ci farebbe piacere-specifica luoghi
12	Prima di cortesia poi più decisa	Piacere di un sopralluogo	Richiesta esplicita di un sopralluogo
13	Attenta e corretta	Se il lavoro fosse stato fatto a casa mia avrei fatto la segnalazione	Trattandosi di denaro pubblico mi sembra doveroso
14	Giusta ma polemica	Tono polemico da parte di XX pur comunque avendo una transazione sostanzialmente giusta.
15	Non espone chiaramente un disagio; è come se stesse chiedendo di soddisfare un dubbio, una curiosità.	Il modo di esporre di XX è piuttosto informale.
16	Come una dipendente un po’ preoccupata e forse un po’ pignola.Le pare che i lavori non siano molto deguiti.	"Fare presente"	"come dovuto", in particolare "dovuto" indica uno stato mandatario di cose secondo lei forse non raggiunto.
17	Posizione sicuramente svantaggiosa, che non porta alla comprensione della sua richiesta da parte del lettore
18	XX può essere dfinito come colui che da avvio alla comunicazione. Nell'interazione è colui che fa una richiesta	Ci farebbe piacere che un tecnico venisse qui… per fare un sopralluogo
19	XX si pone come parte che in primo luogo domanda un qualcosa e in un secondo momento presenta il proprio punto di vista sul lavoro in questione	Nell'ultima e-mail XX si rivolge a YY anche in modo meno contento e direi quasi professionale.
20	Posizione subordinata	NR
21	Forse ha motivi di insoddisfazione ma li esprime male.	Richiesta di attenzione vaga
22	Solite lamentele di chi lavora nel pubblico ed è frustrato	Le volevamo far presente
23	Dipendente della sede	Dipendente presso la sede interessata dall'intervento
24	Rilassata nel far sapere l'andamento dei lavori che procedono bene.	Le volevamo fare presenteche i lavoti di cui sopra stanno procedendo da una quindicina di giorni
25	Sembra impaziente percheè vuole vuole una visita del responsabile tecnico della provincia.	La mail è firmata da XX e da tutti èer sottolineare l'importanza della mail stessa.
26	Ligio al dovere	Invito al controllo dello stato dei lavori,mettere in risalto le "imprecisioni per risolverle".
27	Di responsabile invece che di semplice dipendente, ruolo importante nella comunicazione.	Modo di esporre,rilevazione attenta e precisa dei problemi.
28	Non chiara nelle intenzioni:domanda in forma di critica	Prima XX chiede un sopralluogo poi parla dei difetti specifici
29	La posizione di XX è di accertamento che i lavori si stiano svolgendo nel modo corretto.	ci farebbe piacere che almeno una volta un tecnico
30	Di rimprovero e di forte sollecitazione	"Ci farebbe piacere che almeno una volta un tecnico della ns Provincia venisse qui"
31	Posizione di critica	Essendo denaro pubblico mi sembra doveroso che alcune cose vengano aggiustate.
32	E' il dipendente della struttura interessato ai lavori.	Si parla di area B del palazzo.
33	Critica e insoddisfatta	"Almeno una volta"	"Ci farebbe piacere "sembra un po’ ironica.
34	Direi che XX è una persona estrerna all'ambiente di lavoro di YY.	Egregio architetto.	Gentile Signora.
35	Svantaggio	Verifica dei lavori
36	XX è il mittente della comunicazione.	Volevamo far presente	Ci farebbe piacere che un tecnico venisse a fare un sopralluogo
37	Comportamento normale per chi richiede l'attenzione di YY.	Le volevamo chiedere…	Ci farebbe nel contempo piacere…
38	Scocciato	XX:"da una quindicina di gg, ci farebbe nel contempo piacere"
39	Comunicazione a YY che un tecnico della provincia andrebbe a verificare lo svolgimento dei lavori.	Ns tecnico della provincia.	Se i lavori procedono regolarmente.
40	XX è interessata ai lavori svolti nel palazzo.	Ho dedotto ciò dal suo interessamento di contattare la ditta di YY
41	Nell'interazione XX ha avuto una posizione di controllare i lavori e il buon senso di non chiudere un occhio.	…che pur riconoscendo di poca importanza, secondo me dovrebbero essere aggiustate…
42	Propositiva ed arrabbiata.	La frase di XX:"…ci farebbe comunque piacere che…" sembra un modo ironico per dire:"potreste almeno venire a vedere".
43	XX è una dipendente che vuole che i lavori che si stanno eseguendo vengono condotti correttamente e che vuole che qualcuno venga a controllarli.	"Ci farebbe veramente molto piacere".	"I lavori procedono secondo il cronogramma prestabilito"
44	Sembra una a cui nessuno da ascolto è onesta	Se fossero stati fatti a casa mia.	E' l'impressione che ho avuto non c'è un elemento che mi abbia condotto a questa risp.
45	Cerca in modo gentile di far capire una situazione di disagio.	NR
46	Si pone gentilmente come emittente di un messaggio di richiesta.	Chiede una verifica dello stato delle cose e si prodiga a sottolineare l'importanza che le cose procedono regolarmente.
47	Subordinata.	Ci farebbe piacere che almeno una volta…
48	Ha una posizione critica nei confronti della ditta che ha operati gli interventi al sistema di climatizzazione.	"Se il lavoro fosse stato fatto a casa mia farei la segnalazione ed essendo denaro pubblico mi sembra doveroso visto che la ditta dovrebbe eseguire il lavoro a regola d'arte".
49	Un dipendente che si preoccupa affinchè il lavoro venga svolto in maniera efficace.	dalla frase"venire qui nell'ala B del palazzo fare un sopralluogo e verificare lo stato delle cose".
50	Aggrsseiva, determinata , in disaccordo con le modalità di svolgimento dei lavori.	Il modo di esporre che ignora sostanzialmente la risposta rassicurante di YY.
51	Si pone in modo formale e con toni moderati, nonostante si tratti di una lamentela da parte di tutti.	"Egr.Arch.","le volevamo far presente…ci farebbe nel contempo piacere".	"La ringraziamo e porgiamo distinti saluti".
52	Sembra un dispendente; forse non dovrebbe occuparsi lui di segnalare il fatto?	In premessa XX è un dipendente presso la sede, non il datore di lavoro.
53	XX ritiene di avere il diritto (forse anche il dovere) di segnalare al resp.YY ciò che, a suo parere, non sta funzionando come dovrebbe.	"Ci farebbe piacere…"	"Controllare se i lavrori procedono come dovuto".
54	Dipendente presso la sede interessata all'intervento.	Ufficio direzione lavori.
55	Mascheratamente polemica	"Almeno una volta un tecnico"…etc	"Se il lavoro fosse stato fatto a casa mia"…etc etc
56	Arrabbiata.	NR
57	Prova un sentimento di esclusione, non si sente presa sufficientemente in considerazione.	"Se lei può passare dal mio ufficio… se il lavoro fosse fatto a casa mia…"
58	Velatamente aggressiva, scontenta, forse lievemente indignata.	Il tono di XX è veramente aggressivo-sarcastico:"Ci farebbe piacere","almeno una volta".	L'uso delle virgolette su "imprecisioni" e "aggiustate", "regola d'arte".	Il riferimento al denaro pubblico e al fatto che la ditta è pagata per quello che fa.
59	Interlocutoria,con un sostrato di appressività latente.	Ci farebbe nel contempo piacere (usa il noi), che almeno una volta(indica una presunta mancanza di YY)…nonché controllare (richiamo al compito di YY).
60	XX è l'emittente, portavoce della ditta incaricata. Firma collettiva.	Usa un tono formale, inpersonale.	Scrive in prima persona plurale
61	Si pone in una posizione di scusa.	"alcuni dubbi"	"poca importanza"	"delle imprecisioni"
62	Prudente e preciso, onde evitare guai.	"nonché controllare che i lavori procedono come dovuto".
63	Non ha elmenti diversi da quelli che presenta.	Tutto il testo della mail con "quindicina" sottolineato.
64	Poco incisiva e distaccata dall'argomento. La richiesta è vaga.	Tutta la mail per come è stata impostata.
65	Regolare.	Se la sig.XX chiede un sopralluogo è sicuramente perché non ha visto nessuno.
66	Cordiale. Educatamente invita la parte YY ad intervenire.	Ci farebbe piacere che almeno una volta…
67	Arrabbiata.	Il tono è di chi richiede un servizio e lo esige.
68	Dipendente che in teoria non è demandato a tale funzione di richiedente. Di solito c'è un referente.	Tutto il testo, in particolare XX si firma a nome dei colleghi.
69	XX è una donna che vuole tutelare il proprio luogo di lavoro, vuole chiarezza.	I lavori procedono come dovuto.
70	XX è una donna che ha a cuore il suo luogo di lavoro pero è strano che interceda lei con YY	Tutta la mail 1
71	XX è una donna gentile che vuole un intervento di YY e lo richiede cortesemente facend ola portavoce dell'ufficio	Parla a nome di tutti
72	XX domanda lecitamentedei controlli e attende una risposta risolutiva	Il suo tono e di chi richiede qualcosa in base ad una necessità
73	XX è una dipendente della provincia pertanto si rivolge alla Arch con un che di subordinanzione	egr.arch	Distinti saluti
74	La dipendente XX utilizza un linguaggio abbastanza informale e amichevole, pur mantenendo rispetto nei confronti del suo interlocutore.	Le volevamo far sapere…quindicina di giorni…ci farebbe piacere…	Se i lavori procedono come dovuto..
75	Inizialemente XX fa una semplice richiesta dopo aver ricevuto la risposta di YY,assume un atteggiamento forse più deciso	Da"ci farebbe"fino a "cose"
76	Polemica; risentita	Che almeno una volta	Controllare se i lavori procedono come dovuto
77	Un richiedente di uno specifico servizio	Come sopra
78	La definirei terza: non è nè la ditta che esegue i lavori né presso l'ufficio preposto al controllo . Si fa inoltre portavoce delle richieste di altri colleghi	Le volevamo fare presente	Si firma "XX e colleghi"
79	E' particolarmente oppositiva, XX attacca YY	Il tono usato
80	Accusatoria ma dovuta	ed essendo denaro pubblico mi sembra doveroso	Essere pagati per questo
81	Colui che richiede	..per fare un sopralluogo e verificare lo stato delle cose
82	E' sicuramente una posizione di inferiorità, nel senso che chiede con tono polemico un servizio necessario per il corretto funzionamento del clima	Verificare lo stato delle cose	Prontamente YY risponde che la verifica è stata fatta e va tutto bene
83	Interessata alla qualità del lavoro	Verificare lo stato delle cose	controllare che i lavori procedano come dovuto
84	Puntigliosa	La richiesta del tecnico della provincia
85	moderatamente polemica	ci farebbe nel comtempo piacere
86	XX si assume la responsabilità di esprimere il disagio degli altri lavoratori	Parlare al plurale	Firmare a nome suo e dei colleghi
87	Posizione di rappresentanza dei dipendenti	firmato XX e colleghi
88	XX è contrariata per le inadempienza di Y ma rimane sulla difensiva	"..ci farebbe piacere che ALMENO una volta…"
89	si sente responsabile della sede interessata dall'intervento	"..essendo denaro pubblico"	"mi sembra doveroso"	"la ditta dovrebbe seguire il lavoro a "regola d'arte"
90	puntigliosa ma comunque di correttezza, fa notare errori ma con fare saputello	"nonché controllasse"	e la parte" se il lavoro fosse stato fatto a casa mia.."
91	seria, corretta responsabile	le ultime due ieri
92	XX è responsabile di controllare che i lavori siano fatti a regole d'arte per cui tende ad essere polemico e puntiglioso, anche più del necessario, non vuole fare brutta figura	ci farebbe piacere che almeno una volta un tecnico venisse
93	polemica	il lavoro dovrebbe essere eseguito a regola d'arte
94	XX non è la diretta cliente di YY, lavorando per una ditta pubblica, ma si pone come osservatrice GIUDICANTE del lavoro compiuto dalla squadra di YY (si sente responsabile di far controllare che tutto vada bene) mancando secondo lei un reale "controllore"	ci farebbe piacere che almeno una volta un tecnico venisse a fare un sopralluogo e controllare;	dubbi	imprecisioni
95	XX è dipendente nel palazzo oggetto dei lavori ed è probabilmente responsabile di verificare tempi e modi di avanzamento del cantiere	le volevamo fare presente	che almeno una volta un tecnico	fare un sopralluogo e verificare
96	dipendente a cui è stato dato il compito di controllare la corretta esecusione dei lavori	il fatto che in "copia conosciuta" ci sia un altro dipendente
97	sente la responsabilità dello svolgimento dei lavori affidati alla ditta esterna	casa mia; se; mi sembra doveroso	denaro pubblico	dovrebbe eseguire
98	responsabile del procedimento	esecuzione dei lavori con fondi pubblici
99	premuroso	bastava una telefonata: il messaggio è troppo articolato e ridondante
100	di responsabilità	fare un sopralluogo	verificare
101	rivendicante	[ poiché ero in ferie… pagata per questo.]
102	Preoccupata per la buona riuscita del lavoro	Nel terzo messaggio ribadisce di verificare "imprecisioni", da "aggiustare".

## Sheet: Question 1-c
ARPA-Firenze * Gruppo ALBERT / Ricerca 2009
N°	DOMANDA 1-c				NOTE
	Come definirebbe la posizione di YY nell'interazione?
	Risposta	Elementi concreti 1	Elementi concreti 2	Elementi concreti 3
1	formale, accetta di mettersi in posizione up	Parla dell'ufficio(3°persona plurale)	Non ringrazia	Linguaggio da addetti ai lavori(cronogramma)
2	Responsabile dei lavori di climatizzazione;deve accogliere richieste e critiche	Definizione di YY nei messaggi	"Responsabile"lavori=colui che dirige ma che,soprattutto,deve far funzionare le cose al meglio	Garantire la migliore funzionalità e il miglioramento
3	YY non si preoccupa di informarsi sui motivi della richiesta e da una risposta che potremmo definire "burocratica"e generica.	"l'ufficio direzione lavori"	"Sopralluoghi e verifiche nelle aree di cantiere"	"Secondo il cronogramma prestabilito".
4	Soggetto che agisce in modo professionalee da responsabile del settore	"provvede"	"ha provveduto"
5	Distaccato rispetto alla posizione di XX, professionale	Il richiamo alla funzione della D.L.come atto legittimamente svolto dal preposto
6	Corretta ma distaccata,quais una formula predisposta per rispondere a eventuali lamentele. Studiata inoltre per limitare le responsabilità dell'ufficio	"Nell'ambito delle proprie funzioni"	"i lavori procedono sostanzialmente"
7	Accetta la sfida e risponde in modo geleico e spersonalizzato.	(l'uffico dir.lavori)	la fase finale(allo stato attuale..cronogramma stabilito)
8	Di completa conoscenza del tipo di lavori che vengono eseguiti	Brevità nella risposta e nelle frasi "provvede ed ha provveduto"
9	NR	NR	NR
10	Molto rigida	I lavori procedono su cronoprogramma stabilito
11	Evasiva e prudente	I sopralluoghi sono avvenuti	Verifiche nelle aree di cantiere
12	Di tamponamento,senza risposta affettiva	Dire che i sopralluoghi sono stati fatti ma molto in generale
13	Distante,non professionale	…nell'ambito delle prorpie funzioni
14	Professionalmente ha atteggiamento pacato	Mi sembra che abbia risposto in maniera piuttosto precisa
15	La posizione di YY è quella di un interlocutore che si limita a far presente che i lavori stanno procedendo, senza mostrare interesse nei confronti del messaggio dell'emittante.	Sottolinea che nell'ufficio sta svolgendo regolarmente le proprie funzioni, senza approfondire i motivi della richiesta.
16	Liquida XX con indifferenza, non le risponde in termini qualitativi ma cronologici. Indica che i controlli già si fanno. Quindi in pratica è una risposta "non risposta".	"Provvede e ha provveduto"	"Cronogramma prestabilito"	Tono sbrigativo e evasivo.
17	YY si è limitato ad "interpretare" la richiesta del dipendente rispondendo a suo modo, utilizzando termini anche tecnici,e assumendo un atteggiamento freddo.	"Cronogramma prestabilito"
18	YY è il destinatario dell'interazione; ma è anche colui che da una risposta	Allo stato attuale i lavori procedono
19	YY è in una posizione quasi comletamente protetta,ostenta sicurezza e ciò presuppone che YY sia dalla parte dellla ragione.	Da"provveduto regolarmente"a "cronogramma prestabilito".
20	Di responsabilità	verifiche
21	Approccio standard difensivo, non interessato alla soddisfazione del "cliente".	Tempi in linea col piano, sopralluoghi genericamente.
22	Giustificazione doverosa	Riscontri precisi su sopralluoghi (le ultime due non più tardi)
23	Responsabile dei lavori	Responsabile lavori di climatizzazione
24	Tranquillo indicando subito di aver fatto eseguire i controlli da parte dei tecnici	L'ufficio…nell'ambito delle proprie funzioni…ha provveduto…ad eseguire sopralluoghi e verifiche.
25	Sembra tranquillo.La mail è solo descrittiva e formale.	L'esposizione è formale.
26	Interliquorio	Nell'ambito delle proprie funzioni, l'ufficio addetto ha provveduto
27	Aziendalista anche se precisa, passiva.	Indicazione dell'ultima data del sopralluogo, tempistica nella risposta.
28	Vaga e non collaborativa: non chiede i motivi che spingono XX a chiedere un sopralluogo	L'ufficio direzioni lavori nell'ambito etc…
29	Il soggetto YY tende a sottolineare in modo deciso che quanto richiesto dal soggetto XX è già stato effettuato.	l'uffcio direzione lavori…provvede ed ha provveduto regolarmente.
30	Fornisce spiegazioni e dimostra che quello che gli viene chiesto è stato già fatto.	"l'ufficio direzione lavori […] provvede ed ha provveduto regolarmente ad eseguire sopralluoghi.
31	Distaccato dal problema, è superficiale.	I lavori procedono sostanzialmente secondo il cronogramma prestabilito.
32	E' un archiettto della Provincia che rincuora il soggetto XX	"Ha provveduto regolarmente"
33	Distaccato. YY sembra non capire i motivi della critica.	"Provvede ed ha provveduto regolarmente…"	"I lavori procedono …secondo il cronogramma prestabilito".
34	Direi che YY è stizzito nel dare la risposta, risponde in modo telegrafico e veloce.	(Le ultime due non più tardi di ieri)
35	Favorevole.	"Non più tardi di ieri"
36	YY è il destinatario della comunicazione, ma diventa anche mittente nel momento in cui risponde ad XX.	Provvede ed ha provveduto…	I lavori procedono…
37	Da responsabile dei lavori-supervisore.	Nell'ambito delle proprie funzioni…provvede ed ha provveduto.
38	Tranquillo	YY:"ha provveduto regolarmente ad eseguire sopralluoghi e verifiche".
39	Comunicazione che i lavori procedono e che i controlli sono stati effettuat (in regola con i tempi)	Sopralluoghi effettuati	Verifiche nelle aree di cantiere
40	L'arch.YY è tranquillo del suo operato svolto nel palazzo.	Da "ha provveduto regolarmente "fino a "cronogramma prestabilito".
41	Non gli interessa assolutamente niente.	…provveduto regolarmente ad eseguire sopralluoghi e verifiche…
42	Tende a proteggere la sua posizione.	"L'ufficio ha provveduto regolarmente a …"
43	YY è il responsabile dei lavori che si stanno svolgendo e sostiene che i sopralluoghi vanno avanti e tutto procede regolarmente.	"I lavori procedono come il cronogramma prestabilito".
44	Scansafatiche, un po’ arrogante.	Provvede ed ha provveduto…
45	Non sembra molto interessato.	I lavori procedono sostanzialmente secondo il cronogramma prestabilito.
46	In maniera esplicita indica che i responsabili hanno provveduto a eseguire i sopralluoghi. Formalità nell'inviare il messaggio.	La conclusione del messaggio con " distinti saluti" che saottolineava la formalità.	Il sottolineare che la situazione sia sotto controllo.
47	Guida.	Ufficio direzione lavori provvede a sopralluoghi e verifiche.
48	Tranquillizza XX dicendo che tutti i controlli sono stati esguiti regolarmente.	"L'ultimo direzione lavori…provvede ed ha provveduto ad eseguire sopralluoghi e verifiche".
49	Un architetto che fa il suo lavoro.	Il fatto che nella mail specifica che sono stati fatti sopralluoghi in quell'ala.
50	Rassicurante e determinato nel difendere il proprio lavoro.	La brevità e sintesi della risposta fornita da XX.
51	Si pone in modo formale, sintetico. Risponde senza venire incontro alla richiesta.	"Provvede ed ha provveduto regolarmente ad eseguire sopralluoghi e verifiche…"	"I lavori procedono secondo cronogramma…"
52	Corretta , ma risponde solo sulla conformità di tempi, non sul contenuto dei lavori.	Riferimento al cronogramma e al ruolo della direzione dei lavori.
53	"Ingessato" in una posizione di difesa e di "non ascolto".	"Provvede ed ha provveduto…"	"I lavori procedono secondo il cronogramma prestabilito…"
54	Responsabile lavori.	Lavori procedono secondo il cronogramma.
55	Autoritaria.Fintamente pacata ed oggettiva.	Tutta la risposta. Tono ufficiale.
56	Dilatoria	NR
57	Corretto ma impersonale.	"L'uffico direzione lavori…nell'ambito delle proprie funzioni…eseguire verifiche…"
58	Difende la sua posizione in toni per lo più neutri.	"Nell'ambito delle proprie funzioni".	"Le ultime due non più tardi di ieri".
59	Ripida, tesa ad affermare la propria posizione, il proprio ruolo, il proprio lavoro e a difenderlo.	…provvede ed ha provveduto regolarmente…	Le ultime due non più tardi di ieri (contrasta L'almeno una volta di XX).	Lo stile è burocratico, freddo.Si firma Dott. Arch.
60	YY recepisce il messaggio. E' il destinatario. Parla a nome dell'"ufficio direzione lavori".	Firma personalmente ma scrive come portavoce dell'ufficio direzione lavori
61	Una persona superiore che risponde anche "in automatico" senza forse aver controllato bene la situzione	Non concreti,ma sembra strano che questi controlli siano stati fatti proprio nel giorno in cui chiede l'intervento XX, senza che XX l'ha notato
62	Ha fatto gli interessi della sua ditta quindi si mette dalla parte della ragione.	" i lavori procedono secondo il cronogramma prestabilito".
63	Da suo protocollo e schedula tutta è già avvenuto.	Sostanzialmente secondo il cronogramma prestabilito.
64	Di routine e priva di sostanza. La risposta non c'è.	Tutto il contenuto della mail.
65	Una posizione di cortesia dato il ruolo che ricopre.	Una sensazione personale.
66	Non propriamente precisa e corretta.	I lavori procedono sostanzialmente secondo…
67	Superiore e gradasso.	Il tono è di chi vuole liquidare i problemi con minimo sforzo.
68	Responsabile dei lavori e in quanto tale è chiamato a dare info solo ad autorizzati.	Rif. All'ufficio direzione lavori.
69	YY è un uomo che non può stare tanto dietro alle lamentele di una semplice impiegata.	"Allo stato attuale i lavori procedono…"
70	YY ha il tono di chi vuole essere sbrigativo e non interessa l'opinione di XX	Da "l'ufficio" a "ieri"
71	YY è l'architetto del tutto e in quanto tale si sente nella posizione di poter trattare chiunque con superficialità	Il suo essere sbrigativo e non dare informazioni dettagliate
72	YY è il capo,architetto dei lavori e rassicura XX	"Le ultime due non più tardi di ieri
73	YY è in posizione di chi ha un ruolo dirigenziale e raramente scende di grago anche solo per dare info	Da"allo stato attuale" fino a "prestabilito"
74	L'architetto mantine una distanza formale nei confronti della dipendente, utilizzando un linguaggio e formule che si avvicinano più ad un linguaggio burocratico.Inoltre sembra seccato dell'intervento della dipendente, perché non è lavoro che le compete.	Nell'ambito delle proprie funzioni…eseguire sopralluoghi…	Allo stato attuale…cronogramma prestabilito…
75	YY nella risposta appare estremamente professionale quasi freddo direi	Da "l'uffcio direzione" fino a "prestabilito"
76	Scocciato dagli appunti fatti	Provveduto ad effettuare regolarmente sopralluoghi
77	Conferma la richiesta fraintendendo però la specifica del tecnico richiesto	Ufficio direzione lavori provvede a sopralluoghi e verifiche.	Ufficio direzione lavori;Provvede e ha provveduto regolarmente
78	Le fa cortesemente presente che le lamentele circa un mancato controllo non hanno motivo di essere	L'ufficio provvede ed ha provveduto regolarmente	Le ultime non più tardi di ieri	I lavori procedono secondo…
79	Il soggetto YY è in una posizione difensivaq	Tende a ribadire l'efficacia e la regolarità dei lavori svolti
80	in difensiva e legittimata	Uguale a sopra
81	Chi si difende	Nell'ambito delle proprie funzioni ha provveduto
82	Poco interessata ai problemi dell'utente	Non fa nessuno sforzo per capire i problemi del cliente ma si limita a liquidare le sue lamentele
83	Interessato alla conclusione del lavoro secondo l'obiettivo temporale	Secondo il cronogramma stabilito
84	Supponente	Utilizzo di un linguaggio forzosamente tecnico (vedi segni sui messaggi)
85	Puntuale, asciutta, ma non risponde alla domanda	Verifiche sull'opera del cantiere (non più tardi di ieri)
86	Esprime sicurezza, superiorità e perfetto controllo della situazione	usa termini netti esprimendo che è stato fatto quello che andava fatto (provvede e ha provveduto)	..e utilizza chiare indicazioni temporali (le ultime due volte non più tardi di ieri
87	mancata collaborazione	mancata collaborazione con i dipendenti	non viene chiesto un riscontro sull'effettivo sopralluogo
88	YY si ritiene dalla parte della ragione	"L'ufficio provvede….	…ed HA PROVVEDUTO REGOLARMENTE
89	Incisivo e formale	"provvede e ha provveduto regolarmente a eseguire sopralluoghi"	"secondo il cronogramma prestabilito"
90	di superiorità nei confronti di XX	la breve risposta concisa e contrddittoria rispetto a xx
91	non dà peso a quello che gli viene richiesto, tende a liquidare l'argomento	ci farebbe	verificare	controllare…dovuto
92	YY: la risposta di YY è concreta e abbastanza esaustiva	abbastanza esaustiva perché dice che i lavori procedono sostanzialmente secondo il cronogramma prestabilito. Non è molto disponibile a fare personalmente un sopralluogo, cosa cha a xx farebbe molto piacere
93	puntuale, distaccata, professionale, non di apertura verso xx	i lavori procedono secondo il cronogramma prestabilito
94	YY è il "controllore" che non ha controllato a sufficienza secondo la XX, finora si è posto invece come puntuale e preciso, risponde alle domande di XX, sembra parlare come chi ha fatto controllo [are] la situazione	provvede ed ha provveduto non più tardi di ieri	I lavori procedono…	2010-08-07 09:46:00
95	YY è architetto e responsabile dei lavori e degli eventuali errori	Egr. architetto YY	allo stato attuale i lavori procedono
96	posizione di forza,dovuta al fatto che i lavori procedono come programmato	il modo di esporre, breve e diretto; l'uso di avverbi come "regolarmente" e "sostanzialmente"
97	se ne frega di YY	ha provveduto regolarmente
98	ditta esecutrice o appaltatrice dei lavori	necessità di terminare i lavori in un tempo determinato
99	tecnica/burocratica	non risponde in prima persona
100	poco interesse	da una quindicina di giorni
101	controparte di XX	l'intestazione cerchiata (B) [ Egr. Architetto]
102	Con poche parole liquida il problema pensando di aver già risolto la situazione.	Le frasi "ho provveduto regolarmente ad eseguire sopralluoghi", "i lavori procedono secondo il cronoprogramma stabilito".

## Sheet: Question 2
ARPA-Firenze * Gruppo ALBERT / Ricerca 2009
N°	DOMANDA 2 (La posizione di XX rispetto a YY è cambiata?)					NOTE
	SI / NO	Se la risposta è SI
		Descrizione	Elementi concreti 1	Elementi concreti 2	Elementi concreti 3
1	SI	Più coraggiosa e utorevole di prima,XX cerca di mettersi in posizone "paritaria", senza essere aggressivo,è più assertivo	Usa la 1°pers.singolare,"se lei potesse passaredal mio ufficio" (non usa ancora l'indicativo ma il congiuntivo)	Nei contenuti chiede con più forza all'altro di andare da lei e dice a YY "cosa è bene fare".	Saluto meno formale e più paritetico: " grazie per l'attenzione.Distinti saluti".Usa il linguaggio tecnico "fan-coils".Assertivo: se fossi a casa mia…mi sembra doveroso"
2	SI	Più insistente, più decisa a far esaudire le sue richieste,fornendo valide motivazioni	Accenna a dubbi e imprecisioni sul lavoro svolto negli uffici	Invita ad un sopralluogo di persona il responsabile e giustifica le sue lamentele attraverso le proprie opinioni sul denaro pubblico e su come si dovrebbe effetture un buon lavoro	Specifica meglio i problemi esistenti
3	SI	E' la posizione di chi fa un reclamo per un dissenzio	"Le farei vederealcune imprecisioni(..) che secondo me dovrebbero essere aggiustate"	"Essendo denaro pubblico mi sembra doveroso"
4	SI	Più paritetica dal punto di vista delle competenze e dei ruoli	"Poiché ero in ferie quando la ditta è tornata a finire il lavoro"	"se il lavoro fosse fatto a casa mia farei la segnalazione ed essendo denaro pubblico mi sembra doveroso.."
5	SI	L'invito iniziale ha lasciato spazio ad uno sfogo personale su elementi più di estetica che di sostanza.	"Il problema riguarda… allette che sono posizionate un po’ storte"	La ringraziamo e porgiamo distinti saluti.
6	SI	Meno scettica	"fare presente alcuni dubbi"	"se lei potesse"	"Imprecisioni,che pur …di poca importanza.."
7	NO		Ultima frase da (il problema…a un po’ storte)
8	NO		Esempio riportato "se fosse stato fatto a casa mia"	"a regola d'arte"
9	SI	Nella prima domanda XX chiede, nella domanda 2 da una risposta
10	NO		Se il lavoro fosse stato fatto a casa mia farei la segnalazione (è superfluo e insignificante)
11	SI	Dopo la risposta di YY la posizione XX cambia e aumenta la puntualizzazione e entra nello specifico dei problemi:Sincero	Entra nello specifico delle imprecisioni descrivendole
12	SI	Più risoluta e decisa	Richiesta di verifica
13	NO		Se il lavoro fosse stato fatto a casa mia farei la segnalazione	trattandosi di denaro pubblico mi sembra doveroso..
14	SI in parte	Un po’ meno polemica ma non totalmente tranquilla	La prima ed ultima parte mi sembra professionale,la parte centrale un po’ meno
15	SI	Maggiormente chiara e concreta	Specifica il motivo della sua richiesta: assenza a causa delle ferie.	Più precisione nella descrizione dei disagi ed espone quali dovrebbero essere gli obiettivi della ditta.
16	SI	Visto l'atteggiamento evasivo di YY in precedenza, è più precisa e incisiva. Richiede una verifica concreta e da una motivazione.Non fa domande perché ha già le proprie risposte.	" Regola d'arte"	"Pagata per questo"	"Grazie per l'attenzione" ,"Non solo nel mio ufficio" Tono meno amichevole e più preciso e secco.
17	SI	Sicuramente quest'ultima e-mail è esposta più correttamente rispetto alla precedente, anche se alcuni aspetti rimangono incomprensibili	Risulta essere incomprensibile o meglio contraddittoria una parte della e-mail e "se il lavoro fosse stato fatto… mi sembra doveroso"	Dubbi,da potesse passare fino a doveroso
18	SI	XX nell'messaggio 3 fa delle puntualizzazioni a YY.Si comporta da "esperto".Cambia prospettiva	Vedere alcune imprecisioni	Dovrebbero essere aggiustate	Dovrebbe eseguire il lavoro a regola d'arte
19	SI	XX nel messaggio 3 è molto più incisiva, disturbata e convinta nell'ottenere un efficacia	Da"se lei potesse"fino alla fine della mail
20	NO		NR	NR
21	SI	Più precisa nelle segnalazioni, posizione difensiva.	Fan coils	"denaro pubblico"	"casa mia"
22	SI	Più precisa e non vaga	Il problema riguarda la parte inferiore…
23	SI	Dipendente che non ha potuto fare presente alcuni dubbi nella fase di lavorazione, poiché era in ferie.	La ditta è tornata a finire i lavori dopo il 25/08,il dipendente era in ferie e ora vuole far presente alcuni dubbi sulla lavorazione in quanto l'edificio è di interesse pubblico.
24	NO		NR
25	SI	Seriamente preoccupata	Tutte le "in sostituzione di termini ben più forti e gli esempi concreti sul non corretto svolgimento dei lavori.
26	SI	Di contrasto	"Se il lavoro fosse stato fatto a casa mia"
27	NO		Tono esplicito, richiesta decisa di un nuovo intervento.
28	NO		nr
29	NO		nr
30	SI	Meno aggressiva	"Non ho potuto far presente alcuni dubbi alla ditta in questione"
31	SI	Più critica e severa	Dovrebbe eseguire il lavoro a "regola d'arte" ed essere pagata per questo.
32	SI	Molto più decisa e dura.	"Eseguire il lavoro a" regola d'arte" ed essere pagata per questo."
33	NO		"Le farei vedere alcune imprecisioni"	"Essendo denaro pubblico mi sembra doveroso"…	"La ditta dovrebbe eseguire il lavoro a regola d'arte".
34	SI	XX è un subalterno di YY (siamo nel settore pubblico).	Ero in ferie mentre la ditta è tornata a finire i lavori, se il lavoro fosse fatto a casa mia.	Denaro pubblico.
35	NO		NR
36	SI	E' cambiato il tono, XX si trova in una posizione di superiorità.	Le farei vedere delle imprecisioni…	Mi sembra doveroso…	Dovrebbe eseguire il lavoro a "regola d'arte"…
37	NO		Sostanzialmente non è cambiata la pos. Di XX in quanto comunque chiede verifica continua (motiv. Ferie) e un ulteriore controllo/incontro per ultima verifica.
38	NO		Il modo di esporsi di XX in quanto tende a puntualizzare in maniera petulante.
39	SI	La YY ha da ridire sul lavoro fatto dicendo che ci sono delle imprecisioni e quindi di ripassare nel palazzo (area B)	Che il lavoro fatto nella parte inferiore del palazzo sembra imbarcato.
40	SI	XX ora è arrabbiata perché ha riscontrato delle imperfezioni al lavoro svolto da YY.	Da "se il lavoro fosse stato fatto a casa mia" fino alla fine dell'e-mail.
41	NO		Fare presenti alcuni dubbi alla ditta in questione
42	NO		NR
43	SI	XX se prima richiedeva solamente dei sopralluoghi per valutare se tutto procedeva correttamente, adesso invece ha accertato che il lavoro non è stato condotto regolarmente.	"Imprecisioni".	"Appropriati"	"Il lavoro dovrebbe essere eseguito a regola d'arte".
44	NO		NR
45	SI	A questo punto dice le cose in modo più chiaro ed esige un intervento seppur rimanendo gentile.	"Dubbi".	"Riconoscendo di poca importanza".	"La ditta dovrebbe eseguire il lavoro a regola d'arte ed esser pagata per questo".
46	SI	Cambia il registro, XX appare meno paziente che nel precedente messaggio.	"Se il lavoro fosse stato fatto a casa mia farei la segnalazione…"	Sottolinea l'irregolarità dello svolgimento dei lavori.
47	SI	Ancora più subordinata.	"Se lei potesse passsare…le farei vedere alcune imprecisioni"	"se il lavoro fosse fatto a casa mia farei la segnalazione".
48	SI	Prima nel messaggio 1 voleva che venissero controllate le procedure dei lavori. Nel messaggio 3 ha delle lamentele a lavori avvenuti.	"Le farei vedere imprecisioni".	"Dovrebbero essere aggiustate"."Fan-ciols imbarcati".	"Posizionate storte".
49	NO		NR
50	SI	Leggermente modificata in direzione più aggressiva come se delle aspettative fossero state disattese.	Il paragone alle modalità di svolgimento del lavoro ed il modo in cui XX ritiene che debba essere svolto.
51	SI	Si rivolge in maniera più ersonale e solleva la questione dal suo punto di vista, non coinvolge colleghi.	"Se il lavoro fosse stato fatto a casa mia ".	"se lei potesse passare dal mio ufficio le farei vedere…"	"Secondo me…"
52	NO		Il modo di esporre ha sempre una vena polemica, non collaborativa. Mi sembra comunque che non dovrebbe occuparsi lui di interloquire con YY.
53	NO		L'intero messaggio risulta caratterizzato da un tono di "accusa"/"denuncia" di uno stato di cose che Xx non condivide.
54	NO		NR
55	NO		Tutta la risposta. Tono ufficiale.
56	NO		NR
57	NO		NR
58	SI	La lamentela è qui esplicita mentre prima il tono era solo sospettoso.	Come sopra, l'uso delle virgolette indica sarcasmo, la lamentela è esplicitamente espressa e descritta (fan-coils).
59	SI	Appressiva in modo esplicito. Appressività sollecitata dalla risposta ricevuta.	La descrizione puntuale. L'uso delle virgolette (vuol dire e non dire), il riferimentoal denaro pubblico.	Il riferimento all'essere in ferie ( si giustifica).
60	SI	Molto più personale, informale.	E' persa la formalità del messaggio precedente
61	SI	Nel primo messaggio è impersonale (formale), mentre nel 3 messaggio è molto più personale	"Io ero in ferie", " se il lavoro fosse stato fatto a casa mia"	Nel primo mess scrive "la rignraziamo e porgiamo…" mentre nel terzo scrive semplicemente"grazie per l'attenzione"
62	SI	Di una persona che prevedeva un lavoro… ed ora lo vuole correggere.	"le farei vedere alcune"imprecisioni"…dovrebbero essere aggiustate".			??????????????
63	NO		NR
64	SI	Leggermente più interessata all'argomento e alla descrizione ma sempre poco incisiva.	Alcune descrizioni della mail.
65	SI	E' stata molto più precisa nelle sue affermazioni.	Date le segnalazioni precise.
66	NO	XX sempre cortesemente chiede intervento a YY sottolineando alcuni problemi.
67	SI	E' più irritata e decisa.	Il ribadire il tutto usando "la metafora" dei lavori a casa propria e del denaro pubblico.
68	NO		NR
69	SI	XX è più insistente e a mio parere, potrebbe infastidire l'architetto.	Da "poiché ero in ferie" fino a "aggiustate".
70	NO		E'solo piùinsistente e poco professionale	Il discorso delle ferie
71	SI	Più scocciata	Il suo essere più direi quasi insistente e decisa
72	SI	Forse XX porta avanti la sua tesi che questi controlli non sono stati fatti	XX individua dei problemi precisi nei lavori effettuati dalla ditta di YY
73	SI	XX si è indispettita	Da"poiché ero in ferie" fino a "regola d'arte"
74	SI	X sembra riacquistare "autorità" nei confronti di YY, utilizzando dei tecnicismi, che la rendono competente agli occhi dell'architetto.	Fan coils	Imbarcata	Alette posizionate un po’ storte.
75	SI	Una posizione direi,di sfiducia, e appare " risentita".	Da "poiché ero in ferie"fino a "per questo"
76	NO
77	SI	Ha soddisfatto o no la sua richiesta, ma la risposta si presenta già nel passo successivo	Non parla affatto della visita del tecnico, che ci sia stata o no
78	NO	Trovo ancora che la questione sia che XX voglia la visita di un tecnico dell'ufficio di controllo
79	SI	E' molto più flessibile: sembra molto calma e gentile	All'inizio mette subito in evidenza che era in ferie nel periodo descritto, come a voler giustificarsi
80	NO		Se lei potesse passare
81	NO		Se lui potesse passare
82	SI	Meno polemica, cerca di mettere da parte il diverbio per far si che YY venga a verificare lo stato dei lavori	Se lei potesse; Imprecisioni; poca importanza;	Essendo denaro pubblico mi sembra doveroso; Essere pagata per questo	Grazie per l'attenzione
83	No
84	NO	Vi è solo un approfondimento del meccanismo di latente sfiducia con chiusura che apre (vedi segni sui messaggi)	Esplicitazione delle perplessità in vere e proprie richieste di intervento	"Imprecisioni"	"regola d'arte"
85	SI	Parla in prima persona	"Imprecisioni".	"a regola d'arte"	"essere pagata per questo"
86	NO		Il tono supponente rimane	si sottolinea con dati concreti la mancanza di controllo dei lavori (imprecisioni da aggiustare)	XX è comunque rispettosa anche se sarcastica
87	NO
88	SI	la definirei come "POSIZIONE DI ATTACCO"	"se il lavoro fosse fatto a casa mia farei la segnalazione"	Visto che la ditta DOVREBBE eseguire il lavoro A REGOLA D'ARTE"
89	SI	XX diviene più puntuale ed espone quelli che secondo lui sono le imprecisioni del lavoro svolto, avanza delle richieste	"se lei potesse passare dal mio ufficio le farei vedere"	"se il lavoro fosse stato fatto a casa mia"
90	NO	non è cambiata ma solo più enfatizzata	le solite che ho segnalato nelle domande precedenti
91	NO
92	SI	E' peggiorata la posizione di XX rispetto a YY in quanto non solo non ha avuto il riscontro sperato dal responsabile, ma il lavoro non è nemmeno stato eseguito a regola d'arte.	"imprecisioni" di poca importanza	se il lavoro fosse stato fatto a casa mia	denaro pubblico
93	SI	Più critica	il lavoro dovrebbe essere eseguito a regola d'arte	i lavori procedono secondo il cronogramma prestabilito
94	SI	Se prima si limitava ad esprimere una necessità di rassicurazioni (c'è qualcuno che controlla gli operai o devo farlo io?) Ora si sente In diritto di pretendere di incontrare direttamente YY per i (secondo lei mancati) controlli e il cattivo lavoro svolto.	le farei vedere alcune imprecisioni	aggiustate	imbarcate
95	SI	Sollecita il sopralluogo e la correzione delle imprecisioni nel lavoro	non ho potuto far presente alcuni dubbi	se lei potesse passare	imprecisioni
96	SI	E' la posizione di chi, a ragione, vuole che i lavori per cui ha sborsato denaro siano eseguiti correttamente	il fatto che vengono evidenziate imprecisioni di poca importanza	il paragonare la sede di lavoro con la propria casa
97	NO
98	NO
99	NO
100	NO
101	SI	Richiamante alla responsabilità di un lavoro mal svolto	poiché ero in ferie……..ed essere pagata per questo
102	SI	E' più insistente	Ancora una volta l'uso delle virgolette e il fatto che parla che si tratta di denaro pubblico.

## Sheet: Question 3
ARPA-Firenze * Gruppo ALBERT / Ricerca 2009
N°	Tipo msg 4 (H/S)	DOMANDA 3				NOTE
		Quale effetto produrrà il messaggio 4 su XX?
		Effetto previsto	Elementi concreti 1	Elementi concreti 2	Elementi concreti 3
1	H	si arrabbia, si sentirà non rispettato, non riconosciuto	"Al fine di evitare di ricevere e-mail"	Parla all'altro in modo indiretto "provvederò…una volta accertatane l'esistenza"	Afferma il proprio ruolo e disconosce quello dell'interlocutore ("tu non esisti") "esiste solo la dott.ssa ZZ". Verbi direttivi:mi aspetto, la informo,ritengo;evitare
2	H	XX potrebbe smettere di inviare lamentele,problemi e/o altre richieste ad YY(che le sta dicendo di"restare al suo posto"	accenno al referente unico della struttura,escluso il quale YY non è disposto ad accogliere segnalazioni dal personale estraneo al procedimento
3	S	Rassicurazione e qualificazione	"La ringrazio"	"l'attenzione…è enormemente utile"	"La posso rassicurare""la invito a far presente …tutte le sue osservazioni alla referente"
4	H	XX dovrebbe segnalare alla Dott.ssa ZZ quello che a lei non torna del lavoro fatto dalla ditta,ma potrebbe arrabbiarsi per il modo in cui è scritto il messaggio.	"Referente unico Dott.ssa ZZ"	"Mi aspetto quindi che ogni comunicazione inerente la porzione di procedimento in oggetto…vengaesposta al mio referente unico"	"Distinti saluti"
5	H	Dovrebbe irritarlo e confonderlo maggiormente	Mi aspetto quindi che ogni comunicazione… venga esposta dal mio referente unico.	Premesso che…	Detto ciò ritengo comunque molto interessante…
6	H	Probabilmente inasprirà la posizione di XX che pur chiedendo dei miglioramenti ai lavori,non è stata però aggressiva né scortese.	"Mi aspetto.."	"Personale che non ha nessun ruolo formale"	"Tale nominativo è e rimane,per quanto mi riguarda.."
7	H	L'incazzatura di XX perché si dice tutto e nulla e lo scarico di responsabilità diretta	Le frasi da-prima dell'inizio dei lavori a modalità provvisoria	E l'ultima frase che mette in dubbio l'esistenza del problema
8	S	Di tranquillità sull'efficienza del riscaldamento e sul buon esito dei lavori.	Ringraziamento in merito alla segnalazione	Invita a fare eventuali osservazioni alla Referente
9	H	Irritabilità	NR
10	S	Sicuramente la risposta di YY è esaudiente.XX ha trovato il tassello mancante nel cerchio che è la mancata comunicazione da parte di ZZ	Referente unico nella struttura nella quale lei lavora per ottimizzare il lavoro
11	S	Tranquillità sul rapporto umano e disponibilità nel risolvere il problema specifico ed eventuali	I primi tre righi della lettera-rassicurare
12	H	Esauriente ma troppo tecnica e particolarmente dura,senza richiesta di rapporti.	Fare presente che c'è un referente	Descrizione in elenco di alcune cose
13	H	Xx che con una semplice risposta del tipo: la ringrazio provvederò o similari, avrebbe concluso la sua richiesta in quanto pienamente soddisfatta,con questa risposta YY si è schierato nella maniera più personale possibile contro XX,la quale sicuramente non mollerà la presa	Mi aspetto quindi-fino a formale nel procedimento.
14	S	La sensazione di aver avuto una risposta chiara con un metodo piuttosto tranquillo,a volte anche familiare.Qualche dubbio però sulle troppe attenzioni date alla singola persona	I concetti base mi sembrano espressi in maniera semplice erispettosa
15	H	Credo un effetto non positivo perché YY invece che focalizzare l'attenzione sel messaggio di XX ha esposto le proprie ragioni e solo alla fine afferma che avrebbe provveduto nell'eventualità	Si parla di una certa risoluzione senza specificare quale e in quali modalità possa essere attuata.	Espone le proprie ragioni senza curarsi delle perplessità e dei disagi di XX, quando avrebbe dovuto partire dal suo messaggio
16	H	XX si sentirà presa in giro o comunque inascoltata ancora una volta o liquidata come pignola. Ha ricevuto informazioni poco inerenti alla domanda e si è sentita dire che non è la persona che può far presente i problemi a YY.	"Una volta accertatane l'esistenza"	YY dice: ha fatto bene a dirmelo, lo sistemiamo sempre che il problema esista e non solo se è una sua visione
17	S	Dovrebbe produrre un effetto positivo da parte di XX,in quanto la risposta di YY era completamente attinente alla richiesta del precedente e non era offensivo
18	S	L'effetto su XX pensa possa essere positivo in quanto le segnalazioni sono state accolte e YY,con l'assegnazione del referente, va incontro alle esigenze e alle richieste di XX.	La ringrazio, ho chiesto e ottenuto un referente unico…	Per facilitare la comunicazione-la posso rassicurare-il procedimento è ancora aperto	La invito a far presente le osservazioni
19	H	Un ulteriore irritazione di XX è molto prevedibile	La mia conclusione è data prevalentemente dal fatto che YY sottolinea che il proprio referente unico per l'esecuzione dei lavori non è XX ma la d.ssa ZZ
20	S	Di efficace sistema di interlocuzione	"presenti….referente della sede"
21	S	Insoddisfazione e reindirizzamento	Ci risulta che il lavoro eseguito sia negli standard.
22	H	Molto tecnico e preciso inibirà XX da avanzare richieste se non pertinenti	Emissione certificato	Regolare esecuzione	…ogni verifica quantitativa e qualitativa…utile alla redazione CRE
23	H	Essendo più informato sul procedimento svolto, giudicherà il da farsi, anche se la sua richiesta è stata di carattere pertinente.	Una volta terminati i lavori e prima dell'immissione del certificato di regolare esecuzione, sarà svolta ogni verifica quantitativa e qualitativa.
24	S	L'effetto di segnalare che i lavori sono stati eseguiti secondo gli standard tecnici. E' stato ottenuto un referente unico.	Da "proprio per ottimizzare" fino a "questo messaggio".	da "da un lato…" fino a "tecnici".
25	H	Non la prenderà molto bene!	Sembra una mail di comodo per "mettere una pezza" al problema, inoltre c'è uno scaricare il problema alla Dott.ZZ.
26	H	Di soddisfazione	"Interessante la sua segnalazione"
27	H	Mail di accettazione di quanto ricevuto	Tono dell'esposizione, divisione in più punti del messaggio,lunghezza del testo	Voler far riferimento alla referente indicata togliendo importanza a XX
28	H	Stupore,sorpresa,fastidio: il problem non viene comunque preso in considerazione (il disagio di XX)	Da "gentile Signora" a "nel procedimento"	Da "detto ciò" a "l'esistenza"
29	H	La risposta inviata produrrà una reazione negativa da parte di XX la quale si sente accusata dal fatto che non era la persona incaricata a porgere reclami in ..	Scelta del referente unico
30	H	Indisposizione	"Ciò al fine di evitare di ricevere mail che provengono da personale che non ha nessun ruolo formale nel procedimento"
31	H	Malcontento e confusione	Ogni comunicazione venga esposta dal mio referente unico per evitare di ricevere mail da personale che non ha alcun ruolo formale nel procedimento.	L'impianto risulta funzionare	Provvederò alla risoluzione del problema.
32	H	Non le chiarirà le idee come dovrebbe , ma la porterà a cambiare interlocutore da YY a ZZ.	Fornisce una risposta non precisa alla richiesta di XX e divaga su argomenti marginali	"Referente unico per l'esecuzione del procedimento in oggetto"	La Dott.ZZ
33	H	Insasprimento della posizioni, già di critica, di XX.	"Personale che non ha nessun ruolo formale nel procedimento" (in riferimento a XX)	"Una volta accertatane l'esistenza"…
34	H	Penso che XX non risponderà all'architetto in quanto la mail ricevuta era chiarificatrice e indicava a XX il nome della persona (Dott. ZZ) a cui rivolgersi per altre richieste.	Un elenco puntato con tutte le risposte.
35	S	Effetto"tranquillizzante":XX si sentirà preso in considerazione.	Contributo	Osservazione	Verifica
36	H	Produrrà una sensazione di fastidio per il tono usato	Premesso che…	Mi aspetto che ogni comunicazione venga esposta dal mio referente unico…	…Evitare di ricevere e-mail da personale che non ha ruolo formale…
37	H	Arch. YY ha risposto appienoalla richiesta pertanto la sig.ra XX non può contrastare.	Parte finale- detto ciò…
38	H	Si altera.	YY:da "mi aspetto quindi…-a- ruolo formale nel procedimento."
39	H	Andrà dal suo responsabile e dirà che è stata trattata male dall'architetto.	Che l'architetto YY aveva come unico referente la Dott.ZZ e non la dipendente XX.
40	H	YY ha usato un tono perentorio e quindi XX si sentirà scavalcata e umiliata.	La struttura dell'e-mail e dall'arroganza avuta da YY.
41	H	Irritazione	"Al fine di evitare di ricevere e-mail che provengono da personale"
42	H	e' sicuramente una spiegazione più esauriente riguardo ai quesiti che lei aveva posto. Forse XX aspetterà di vedere se poi le cose cambiano rimandando per un po’ le sue osservazioni.	"…ritengo interessante il contenuto della sua segnalazione e provvederò…"
43	H	XX non sarà contenta di tale risposta in quanto YY le sta praticamente dicendo che non spetta a lei fargli presente eventuali problemi legate all'esecuzione del lavoro e che quindi ne terrà in considerazione il giusto.	"Mi aspetto che ogni comunicazione inerente la porzione(...)venga esposta dal mio referente unico.	"Provvederò nell'ambito del mio ruolo ad una certa risoluzione del problema, una volta accertatane l'esistenza"
44	H	Fino ad un certo punto sarà indispettita poi invece sarà soddisfatta per la sua disponibilità nell'affrontare il problema.	Personale che non ha nessun ruolo formale nel procedimento.	Da "detto ciò"fino a" l'esistenza".
45	H	Probabilmente attenderà per vedere se effettivamente YY provvederà alla risoluzione del problema se necessario.	Ultima frase.
46	H	YY si pone in una posizione di formalità nei confronti di XX che potrebbe rispondere in maniera comprensiva alle chiare richieste di XX.	Il fatto che la presentazione della Dottoressa unico referente è presentata per punti, cghiari e concisi.
47	H	XX andrà dalla Dott.ssa ZZ a lamentarsi delle "imprecisioni"di cui parlava nel messaggio a YY.	"Esecuzione del procedimento...nominativo per quanto mi riguarda è e rimane la Dott.ssa ZZ.
48	S	Probabilmente lo rassicura e penserà che quindi le cose verranno sistemate.	"La ringrazio per la sua segnalazione".	"Ci è utile per svolgere al meglio il nostro lavoro".	"Il procedimento è ancora aperto e le verifiche finali devono essere ancora effettuati."
49	H	Secondo me XX si sentirà un po’ arrabbiata ma YY ha ragione.	XX non è il referente dei lavori perciò non dovrebbe intromettersi, o comunque parlarne appunto con il referente e tramite questo esporre un suo problema.
50	S	Probabilmente un effetto rassicurante dettato dall'intervento di una terza persona come mediatrice.	L'introduzione di un linguaggio che usa termini come "rassicurare" o il ringraziare per la segnalazione.
51	H	Ringrazierà l'architetto e rinnoverà l'invito a passare dal suo ufficio. Scriverà una mail alla referente per i lavori per sollevare di nuovo la questione.	"Mi aspetto che ogni comunicazione inerente...venga esposta al mio referente unico".	"Ritengo molto interessante il contenuto della sua segnalazione…"
52	H	XX si sentirà offesa per non essere stata presa nella giusta considerazione. Ce l'avrà a morte con la Dott.ssa ZZ.	Parole"il non sprecare denaro pubblico appunto".	Modo di esporre estremamente formale anche se eccessivamente dettagliato e apparentemente disponibile.
53	S	Il primo effetto è di chiarimento dei ruoli e quindi fornisce informazioni sul come procedere in caso di segnalazioni opportune.Il secondo effetto è quello di "scoraggiare2 interventi inopportuni (dato che occorre rivolgersi al referente ZZ.	"…Referente unico…"	"Far presente…le sue osservazioni alla referente" indicano la strada (unica) da seguire.
54	S	Testo eccessivamente lungo e prolisso.	Testo eccessivamente lungo e prolisso.
55	H	Rabbia- e poi disinteressamento probabilmente.	NR
56	H	Insoddisfazione .	NR
57	H	Non ottiene un effetto di rassicurazione che è ciò di cui ha bisogno XX.	Tutto il tono impersonale della risposta.
58	H	La farà indignare ancora di più perché viene messo in questione il suo ruolo riguardo l'argomento. Innescherà maggiore conflitto.	YY risponde a sua volta con sarcasmo: insinua che le interferenze di xx non siano appropriate e siano esse "spreco di denaro pubblico"	"Personale che non ha nessun ruolo formale"
59	S	Positivo. XX dovrebbe percepire l'effettivo interesse da parte di YY a comprendere la sua richiesta e fornirle rassicurazioni in proposito, senza sminuirla.	1)Il riconoscimento dell'utilità della segnalazione.	2)Il tono più caldo, personalizzato non standard.	3)Il riferimento a situazione/condizione con XX. 4)……………………………………..	??????????????????????????
60	H	Il messaggio 4 si presenta come una richiesta di maggiore chiarezza e organizzazione dei lavori. XX si sentirà di avere maggior precisione.	Modalità più formale, inpersonale
61	S	XX pensa che gli eventuali" problemi verranno risolti quando la ditta farà le verifiche finali e il messaggio " ringrazia" XX di tutte le sue osservazioni	" la ringrazio"	"enormemente utile per…"	" per facilitare la c omunicazione", "la prego di segnalare…"
62	S	La persona YY cerca di concentrarisi su tutte le persone coinvolte nel lavoro e non su un'unica e fa presente che il lavoro non è ancora finito.	"ho chiesto un referente unico…al fine di convogliare… tutte le osservazioni…"	"Per quanto riguarda… il procedimento è ancora aperto"
63	H	Troveranno l'anello mancante.	Da " mi aspetto…."fino a "procedimento".
64	H	nessun effetto.	la posizione iniziale di YY è stata poco incisiva e distaccata e probabilmente anche perché priva di delega chiara.
65	S	Il sig.YY la tira troppo lunga e specifica cose nuove non dette. Se fossi la sig.XX comincerei ad innervosirmi.	La Dott.ZZ non è stata mai menzionata prima d'ora.
66	H	Si incazza.	Le verifiiche verranno fatte solo al CRE e lui i lavori ala B solo se esposti da la Ref.ZZ
67	S	Soddisfatta ma non fino in fondo.	YY la prende con le buone vedendo che XX è stato un "osso duro".
68	H	XX ha ottenuto da YY la giusta risposta.	La lunga spiegazione per punti.
69	S	XX viene lisciata dall'architetto che la calmerà togliendosi il fastidio.	Il tono pacato e fin troppo a "sfottò".
70	H	XX si sentirà maltrattata e forse sarà la volta buona che un superiore"di lei" interverrà	L'impatto visivo della mail
71	S	Forse i 2 troveranno un punto d'accordo	Il modo di esporre di YY che finalmente sembra tornare con i piedi per terra"
72	H	E' la classica risposta di un capo indispettito, XX dovrà chinare il capo e lasciare stare	Il tono arrogante di YY
73	H	XX sarà prfondamente offesa in quanto ha usato toni quasi minatori	Stesso la divisione per argomenti schematica della mail di YY,quasi a rendere più incisivi i suoi punti argomentativi
74	S	XX presumibilmente ringrazierà YY, perché ha ottenuto quantomeno un referente unico per la sede nella quale lavora XX	Da"un referente" fino a "Dott.ZZ"
75	H	Penso che XX si risenta in qualche modo	Gran parte della mail estremamente burocratica e eccessiva nel dettagliare ogni passaggio
76	H	Si irrigidirà ancora di più nella sua posizione trovando che le sue osservazioni risultano ignorate	Elenco minuzioso dell'operato di controllo
77	S	Interesse a contattare ZZ per sopralluoghi e verifiche	Fin dall'inizio dei lavori un referente unico
78	S	Si sentirà compresa, utile e tranquillizzata	La ringrazio…l'attenzione dei colleghi…ci è enormemente utile	La posso rassicurare…	La invito a far presente le segnalazioni al referente unico…comunque il procedimento è aperto alle verifiche finali.
79	H	Produrrà un effetto negativo su XX, portandola ad utilizzare un tono di attacco nei confronti di YY. La risposta di XX sarà molto più eccessiva da un punto di vista negativo, e il tono tornerà ad essere quello iniziale	La richiesta di un referente unico	La messa in evidenza della funzionalità dell'impianto	Il volersi accertare della reale esistenza del problema evidenziato da XX
80	S	XX si sentirà più accudita e il suo livello di per così dire aggressività e la sua insistenza cadranno	La ringraziamo per questa sua segnalazione	Rassicurare sul fatto che	Far presente le sue osservazioni; l'occasione mi è grata per..
81	H	Sarà disorientante e irritante	troppi punti	Irritante:"ogni comunicazione…. venga esposta dal mio referente unico."
82	S	Non rassicurerà XX che vuole assolutamente che l'operaio si rechi nel suo ufficio a controllare il climatizzatore	Ricordo la precedente alla quale ho risposto a suo tempo	Il lavoro ha seguito finora tutti gli standard tecnici
83	H	Aumentare l'acredine tra XX e YY perché si sentirà scalzata dal ruolo che, magari, informalmente ricopriva	cc: Dott. ZZ;unico referente; è e rimane;con la Dott. ZZ è stato concordato KK;	Ancorchè in modalità provvisoria mi aspetto
84	H	Irritazione e frustrazione	YY intenzionalmente persevera nell'utilizzo di un linguaggio che mira a far sentire in difficoltà l'interlocutore e scredita l'interlocutore
85	S	Conferma la mancata risposta alla prima mail	Non ricorda se glielo aveva segnalato	Verifiche finali con eventuali sopralluoghi
86	H	verrà percepito come un rimprovero.XX non sentirà di essere stata ascoltata e percepirà la chiusura come vera formalità	Viene sottolineata la gerarchia (mi aspetto che ogni comunicazione…venga esposta dal mio referente)...	…e la posizione subalterna di XX 8personale che non ha alcun ruolo formale)
87	S	responsabile non più visto come punto di riferimento	XX conferma?rivolgersi al suo responsabile nonostante l'interessamento sullo stato dei lavori sia diverso
88	S	XX sarà senz'altro risentita e probabilmente si sentirà sminuita nel proprio ruolo lavorativo, tuttavia credo che cederà a ZZ questo compito	ho chiesto e ottenuto un REFERENTE UNICO che penso LEI conosca
89	S	Rassicurante	2ho chiesto e ottenuto fin dall'inizio dei lavori un referente unico"	"la posso rassicurare sul fatto che tutto il lavoro ha seguito finora gli standard tecnici"
90	S	di stizza iniziale ma comunque rassegnazione a procedere come riferisce nel messaggio 4	La ringrazio	la lunghezza della risposta, che sembra far presupporre un maggiore interessamento	il fatto di sottolineare che non spettava a XX segnalare errori
91	H	irritazione	la formalità della mail e la sottolineatura del fatto che qualsiasi notizia debba pervenire alla ref. ZZ
92	S	XX avrà ancora meno fiducia nell'azienda che in questo caso è rappresentata da YY in quanto siamo ormai a fine lavori ed ancora non ha mai avuto risposte esaustive ed un vero referente	non ricordo se glielo avevo detto
93	S	Seccatura perché dovrà far riferimento ad un nuovo interlocutore e perché non ha ottenuto una risposta concreta	per ottimizzare questo ho chiesto e ottenuto fin dall'inizio dei lavori un referente unico	il lavoro è stato eseguito secondo gli standard tecnici	la invito a far presente al più presto le sue osservazioni al referente
94	S	YY si mantiene sul generico, sostanzialmente, ignora gli appunti di XX mettendoli in discussione, facendo riferimento a freddi standard tecnici richiesti.XX non sarà soddisfatta, si terrà i suoi dubbi e probabilmente si rivolgerà ad altri ,superiori di YY, oltre che ZZ (presentato troppo tardi, e solo elemento di distanza)	tono molto distaccato e informale,	da testo presumibilmente standard	un po’ raffazzonato
95	S	YY devia il problema del sopralluogo e degli aggiustamenti su un'altra persona, dando l'impressione a XX di rinviare le riparazioni a data da destinarsi, magari a mai, la risposta di YY scatenerà una reazione negativa in XX	tutto il lavoro ha seguito gli standard	far presente…. alla referente	le trasmetterà in modo che ne possiamo tenere conto in sede di verifica finale
96	S	XX sarà innervosito	il fatto che YY non prenda in considerazione le osservazioni di XX solo per un atto formale di assegnazione di ruoli
97	S	Si inalbererà perché vuol dire la sua direttamente a XX senza passare da ZZ	nessuna. Dalla reazione alle precedenti e-mail
98	S	Individuare il referente	la necessità di ultimare i lavori	e la consapevolezza della buona esecuzione
99	S	Di sicuro impatto, forse si tranquillizza, riceve attenzione	riceve una soluzione presente (referente) e una soluzione futura, lettera lunga
100	S	di rassicurazione	la ringrazio per la nuova segnalazione	per ottimizzare	posso rassicurare
101	S	rassicura e tranquillizza, fa percepire interessamento e serenità	la ringrazio per la nuova segnalazione	la invito a far presenti tutte le sue osservazioni alla Referente	l'occasione mi è grata per porgerle i più cordiali saluti
102	S	Certezza di essere tenuta in considerazione	"la ringrazio"	"la posso rassicurare"

## Sheet: Question 4
ARPA-Firenze * Gruppo ALBERT / Ricerca 2009
N°	Tipo ms.alt. (H/S)	DOMANDA 4				NOTE
		Quale effetto produrrà il messaggio 4 alternativo su XX?
		Effetto previsto	Elementi concreti 1	Elementi concreti 2	Elementi concreti 3
1	S	Accettazione,distensione,collaborazione	Ringrazia,verbi di "accoglienza"(ricordo,ho risposto,rassicurare,la invito)	Linguaggio positivo(attenzione,utile,ottimizzare)	Trasparenza(metto in copia la dott.ssa ZZA,la invito a segnalare ai colleghi).Il saluto:"l'occasione mi è grata .."
2	S	Enorme soddisfazione per aver avuto accolta la sua richiesta e gratitudine per la cordialità usata.	YY,all'inizio,ringrazia della segnalazione	Non ordina,ma consiglia,di convogliare le osservazioni verso il referente unico,che indica.	Invita comunque XX e i suoi colleghi a far presenti al referente tutte le informazioni,per ottimizzare la verifica finale
3	H	Irritazione, ostilità.	"mi aspetto","personale che non ha alcun ruolo formalenel procedimento"	"Tali lavori non dovrebbero riguardare l'ala B"	"una volta accertatane l'esistenza"in generale il gergo tecnicistico
4	S	XX si sente accetta e sarà portata con serenità a segnalare quello che non le torna alla referente ZZ.	"La ringrazio per questa sua segnalazione"	"Proprio per ottimizzare questo suo contributo"	"I miei più cordiali saluti"
5	S	Avrebbe saziato il bisogno di attenzione pur evidenziando i ruoli e contributo ad una corretta chiusura del rapporto lavorativo	Proprio per ottimizzare questo contributo…	La ringrazio per questa sua nuova segnalazione…
6	S	Molto positivo e rassicurante.	"La ringrazio","L'attenzione è enormemente utile"	"Convogliare più efficaciemente","La posso rassicurare".	I riferimenti ai messaggi di XX messi tra parentesi sul testo.
7	S	Rassicura XX e lo rende partecipe al procedimento pur allargando la responsabilità a terzi "Dottor ZZ"	Il tono e l'impostazione della risposta che rende merito alle segnalazioni fatte.
8	H	Un irrigidimento	La forma della risposta con riferimento anche alla composizione strutturale	Invita a fare eventuali osservazioni alla Referente
9	S	Una rassegnazione	NR
10	H	Ancor più esaustivo ma polemico	(Per non sprecar denaro pubblico appunto)
11	H	NR
12	S	Più diplomatica quindi soddisfacente	Inizia con ringraziamento anche se in sostanza dice le stesse cose della prima
13	S	XX gradirà molto la risposta e cercherà anche la collaborazione dei colleghi per far si che tutti i lavori siano eseguiti a regola d'arte	Tutta la mail,dalla prima all'ultima parola
14	H	Di ulteriore irrigidimento anche perché è scritta in maniera piuttosto risolutiva e stile "il capo sono io"	L'intera mail
15	S	Un effetto positivo perché mostra un interesse maggiore nei confronti della segnalazione da parte della signora;YY espone cosa ha concretamente fatto per ottimizzare i risultati rassicurando inoltre XX.	"la ringrazio" , "nuova segnalazione" il che attesta che abbia posto attenzione anche a quelle precedenti	"al fine di convogliare più efficaciemente tutte le osservazioni del personale verso il mio ufficio"	"Facilitare la comunicazione" attesta che YY vuole che la comunicazione sia chiara.	"la sua richiesta","rassicurare","la invito a far presenti al più presto tutte le sue osservazioni", si mostra interessato nei confronti dell'interlocutare.
16	S	Si sentirà ascoltata e rassicurata, e avvertirà che la sua segnalazione è stata utile. Questo messaggio conclude una modalità comunicatica efficace,con le risposte che da YY attendeva.A differenza dell'altro messaggio YY dice che ha inoltrato la mail a ref unico	Gentilezza e assertività e capacità di dare risposte" rassicurare"	"La ringrazio","enormemente utile".	Inoltre qui, per la prima volta si fa riferimento a comunicazioni precedenti. Inoltre ci sono elementi metacomunicativi.
17	H	Si tratta, secondo una mia interpretazione, del messaggio non inviato quindi sconsigliato,e dovrebbe avere un effetto negativo o comunque confusionale.	"Personale che non ha nessun ruolo formale nel procedimento"
18	H	L'effetto potrebbe essere meno positivo rispetto alla risposta precedente; in quanto le segnalazioni vengono accolte come critiche dalle quali YY si vuole difendere.	Premesso che…i lavori sono terminati in linea con il cronogramma; l'impianto risulta funzionare	Provvederò nell'ambito del mio ruolo ad una certa risoluzione del problema, una volta accertata l'esistenza.
19	S	XX si sentirà ascoltata è tenuta di conto, inoltre le viene anche data un indicazione esaustiva e ben precisa su come risolvere il problema	Le parole rassicranti che vanno da " per quanto rigurada" fino a "verifica finale"
20	H	Inefficacie sistema di comunicazione	I punti in cui si evidenzia la presenza di un referente unico diverso da XX
21	H	Irritazione e insoddistazione	Non recepimento della segnalazione specifica. Reindirizzamento a ZZ con "verbosità" superflua e "impermeabile".
22	S	Si sentirà presa in considerazione e soddisfatta non avanzerà altre richieste	La ringrazio per questa nuova segnalazione
23	S	XX è rassicurato sia dal lavoro eseguito finora, e siadal fatto che i procedimenti per eventuali verifiche sono ancora aperti	Il lavoro ha seguito finora gli standard tecnici e formali richiesti e che i procedimenti per eventuali verifiche sono ancora aperti.
24	H	Mettere in evidenza con precisione in vari punti l'andamento dei lavori; l'aver messo in evidenzadi avere un unico referente.	Da "prima" fino a "provvisoria"
25	S	Tranquillizzerà la XX	La mail è dettagliata e cerca di dare spiegazioni tecniche ai dubbi di XX.
26	S	Poca soddisfazione	Frasi generiche e che tra l'altro rimandate a persona terza
27	S	Nessun effetto decisivo, XX continuerà a portare avanti la propria richiesta	Tono poco deciso nell'esposizione	Invito a far comunque presenti, anche se attraverso ZZ, le proprie richieste.
28	S	Soddisfazione: è stato preso in considerazione il disagio di XX ( anche se probabilmente il problema tecnico non sarà riolto)	Tutto il testo
29	S	La mail produrrà un effetto positivo in quanto provvederà a rassicurare il soggetto XX	Rassicurare del fatto	il procedimento è ancora aperto (con eventuali sopralluoghi)
30	S	Soddisfazione o quanto meno presa d'atto.	Lo stile è molto gentile .	"la invito a fare presente al più presto tutte le sue osservazioni alla referente della sede.
31	S	Chiarezza circa la situazione e migliore predispozione alla comunicazione	NR
32	S	XX riceverà una risposta alla sua domanda(richiesta) e nello stesso tempo acqisterà fiducia nei confronti della ditta appaltatrice.	Il testo è molto più colloquialerispetto al precedente	"Cordiali saluti".
33	S	XX sarà rassicurata sulla prosecuzione dei lavori e la sua posizione inizialmente iper critica e insoddisfatta sarà un po’ placata dalle parole di YY.	"L'attenzione dei colleghi che lavorano…è enormemente utile …"	"La posso rassicurare…"	???
34	S	Soddisfazione nell'aver contribuito al bene dei comuni cittadini nel buon funzionamento del servizio pubblico.	La mail scritta è molto discorsiva, quasi affuttuosa e ossequisa.
35	H	S'incazza: messaggio estremamente tecnico che non tiene conto dell'aspetto "umano".	Procedimento	Esecuzione	Regolare esecuzione
36	S	Questa risposta consente di ristabilire dei toni calmi	La ringrazio…convogliare efficaciemente le osservazioni…	La posso rassicurare…	La invito a far presente le osservazioni…
37	S	Positivo	Tono della mail
38	S	Questa mail genera un effetto di soddisfazione nei confronti della dipend in quanto si sente più coinvolta e presa in considerazione.	Da:"dall'altro la invito-a-alla referente della sede.
39	S	Sarà contenta che è stata presa in considerazione la sua mail di protesta.	I lavori non sono completamente finiti e che quindi se ci sono osservazioni da fare basta comunicargliele.
40	S	XX si sentirà soddisfatta e rassicurata del buon esito dei lavori.	Il tono più gentile del YY.
41	S	Confermo irritazione	"il referente è la Dottoressa ZZ"
42	H	E' sempre un intervento esauriente e cortese, però è mirato a sottolineare che non è XX a doversi occupare della questione, ma deve demandarla ad un referente.	"…la invito a far preste al più presto tutte le sue osservazionialla Referente della sede…"	"…ho chiesto e ottenuto un referente unico…"
43	S	Il messaggio alternativo usa dei toni e delle parole molto più gentili e cortesi, quindi non susciteranno reazioni negative in XX.	"La ringrazio per questa sua segnalazione"	"L'attenzione dei colleghi(…)è enormemente utile per svolgere al meglio il nostro compito".
44	S	Compiaciuta.	La ringrazio.	Rassicurare sul fatto che…	La invito a far presente al più presto tutte le sue osservazioni…
45	S	Attenderà le verifiche finali ed eventualmente farà presenti altri problemi al referente.	NR
46	S	Rassicurazione, potrà fare affidamento su un referente di sua conoscenza che faciliterà la comunicazione in caso di problemi.	Il tono di YY è meno formale, gentile e disponibile a qualsiasi ulteriore chiarimento e questo porterà XX a rispondere ed esprimere ringraziamento circa la disponibilità.
47	S	Si tranquillizzerà convinto che ci saranno verifiche per ottimizzare i lavori.	"Rassicurare che tutto il lavoro ha seguito standard… e che il procedimento è ancora aperto a verifiche finali (con eventuali sopralluoghi).
48	H	Sarà ancora più indignato ma almeno ha una situazione dettagliata.	"Risoluzione del problema, una volta accertata l'esistenza".
49	S	Secondo me XX si sentirà parte del programma del lavoro, e sarà contenta, data la gentilezza della mail di recarsi dal referente per qualsiasi problema.	La gentilezza e disponibilita di YY che si possono evincere dal testo della mail.
50	H	Una reazione di chiusura ed inasprimento del conflitto da parte di XX.	Il linguaggio secco e teso a prendere le distanze sottovalutando la competenza degli addetti ai lavori.
51	S	Il dipendente dato il tono della risposta ringrazierà l'architetto ed invierà una mail a nome di tutti i colleghi al referente. Sarà più rassicurato.	Gentile,la ringrazio, l'attenzione ci è utile.	"Per ottimizzare…efficaciemente tutte le osservazioni verso il mio ufficio".	"Procedimento aperto","l'occasione mi è grata…"
52	S	Molto gratificante, XX si sentirà importante e disposta a collaborare più che mai coi colleghi e con YY.	"La ringrazio","Ricordo".	"E' enormemente utile","La prego di segnalare".	"In modo che ne possiamo tenere conto".
53	H	L'effetto di un'"attenzione" nei confronti dei messaggi di XX.	L'elenco delle attività svolte e da svolgere e le precisazioni evidenziano la volontà di dimostrare non solo di aver voluto rispondere ma anche in maniera adeguata.
54	H	Testo eccessivamente lungo e prolisso.	Testo eccessivamente lungo e prolisso.
55	S	Soddisfazione. Solo permarrà un leggero dubbio in merito alla risposta, ma non all'architetto.	Tutto.
56	S	Soddisfazione.	NR
57	S	XX si sentirà tenuta in considerazione, diviene un interlocutore diretto.	Tutto il tono più coinvolgente e rassicurante rispetto al 4H.
58	S	Il tono è molto umile e professionale, la risposta sarà decisamente più positiva.	Si esprimono gli stessi concetti senza sarcasmo e senza velati attacchi personali.	Inizia ringraziando anziché mostrando aggressività.	Da' comunque importanza a XX.
59	H	Negativo. Rinforzerebbe l'appressività di XX che potrebbe, a questo punto sorpassare YY per rivolgersi a un suo superiore	1) il linguaggo tecnico che cerca "di …" 2) la schematicità del testo che lo rende freddo e formale.	3) l'uso di espressioni direttive quali" mi aspetto… del mio referente"	4) la svalorizzazione di XX (personale che non ha nessun ruolo formale nel procedimento)
60	S	Rassicurazione, puntualità	Il tono è formale ma meno "duro" del precendete messaggio
61	H	XX si " arrende" al testo molto tecnico e pesante e pensa che tanto è inutile sengnalare altro a YY che non farà niente	Già la prima fase "premesso che nell'ottica di…" o molto " complicata" per far sentire XX sempre inferiore.	"Comunicazione venga esposta dal mio referente unico".
62	H	La persona XX si sentirà smontata, in quanto si è presa un onere che non gli competeva.	" Tale nominativo… è la Dott.sa ZZ ".	"L'impianto risulta funzionante… in modalità provvisoria".
63	S	E' il caso che la Dott.ssa ZZ faccia il suo lavoro e non demandi a chi non può prendersi carico di un compito tecnicamente non al suo livello.	Facilitare la comunicazione.
64	S	Nessun effetto.	la posizione iniziale di YY è stata poco incisiva e distaccata e probabilmente anche perché priva di delega chiara.
65	H	Devastante. Tutte le cose elencate cosa c'entrano con la richiesta della sig.XX? Mi sembra una presa per i fondelli.	Tutta la mail.
66	S	Cortesemente gli dice di ZZ che si occuperà della cosa (anche se non vero).	La posso rassicurare che il procedimento è aperto e verifiche e sopralluoghi devono essere ancora effettuati.
67	H	Credo che a XX venga una crisi di nervi e usi la Dott.ZZ per far presente le mancanze di YY (a livello personale).	L'uso della scaletta.
68	S	XX sarà più contenta nonostante yy abbia detto le stesse cose ma con tono più compiacente.	Da "la ringrazio" fino a "cordiali saluti".
69	H	XX sarà profondamente offesa come donna, messa da parte e liquidta malissimo.I punti divisi sottolineano l'irritazione di YY e il suo voler colpire XX
70		Questa risposta di YY sarà più ben accetta rispetto alla precendete	Il tono generale della mail
71	H	Con questa mail Xxandrà su tutte le furie. YY pecca qui di narcisismo.	Tutta la mail
72	S	E' una risposta più tranquillo che sa pero di contentino	YY prende XX con le buone
73	S	Quest'altra mail sarà presa meglio da XX anche se sostanzialemnte vengono dette le stesse cose ma con tono più leggero	Da " la ringrazio" fino a "nostro compito"
74	H	XX probabilmente rimarrà seccata da questa risposta perché discredita quelle che sono le sue segnalazioni.	Da "evitare" fino a "procedimento".	da "lavori" fino a "frigorifera"
75	S	Penso che XX sia confortata è più tranquilla e soddisfata	L'incipit è gran parte della mail
76	S	XX si sentirà considerata e rassicurata e penserà di essere stata utile	La ringrazio	in generale il tono di familiarità
77	H	Lo stesso interesse a contattare ZZ con l'aggiunta di svolgere un controllo approfondito sulle note inviate a YY	Lavori terminati in linea con il cronogramma	E mail schematica e insisteNZa sul fatto di non volersi assumere la responsabilità e scaricare su ZZ
78	H	Non farà altro che rafforzare l'idea che l'ufficio preposto al controllo non faccia il proprio lavoro, inasprendo il conflitto	Le fa notare bruscamente che lei non è la persona che deve occuparsi di tale questione e mettendo in copia chi ne è incaricato (ZZ).	Mette in dubbio la sua parola con:"Risolveremo il problema una volta accertatane l'esistenza".
79	S	Produrrà un effetto positivo: XX risponderà in modo cordiale	Il ringraziare XX all'inizio del messaggio e mostrare positività circa l'attenzione di XX verso lo svolgimento dei lavori	Il tono è molto più pacato e cordiale rispetto al messaggio 4 precedentemente proposto
80	H	Si sentirà rimproverato, impotente così da aumentare la sua aggressività e senso di rivincita	Per non sprecare denaro pubblico appunto	Mi aspetto venga espsosta al mio referente unico	Ciò al fine di sviare
81	S	Gratificante	La ringrazia: "l' attenzione dei colleghi…enormemente utile"
82	H	Sicuramente si infastidirà a causa del tono arrogante di YY, e neanche questa risposta è corretta alle esigenze di XX	Per non sprecare denaro pubblico	L'impianto risulta funzionante	Tali lavori non dovrebbero …palazzo
83	S	Risoluzione del conflitto se XX non riesce a leggere fra le righe	Ringrazio segnalazione,attenzione dei colleghi è utile;sorvegliare efficacemente	referente Dott.ssa ZZ; la invito a far presente al più presto	L'occasione mi è grata
84	S	Riconoscimento del suo ruolo, accettazione	Ottica di gestione collaborativa	riconoscimento della utilità delle osservazioni
85	H	Risoluto, puntualizza ed avverte	A es: ricevere mail che provengono da persone che non hanno ruolo formale
86	S	XX si sentirà partecipe e valorizzata da YY	YY rinnova alla signora XX l'invito a fare segnalazioni (far presente tutte le sue osservazioni al referente )..	…e fa cenno alla mail precedente sottolineando il suo interesse per le parole e le osservazioni di XX
87	H	conferma del ruolo di responsabile di YY	comunica la sua conoscenza sullo stato dei lavori
88	H	sarà ancora più sminuita nel proprio ruolo	"..mi aspetto che ogni comunicazione venga esposta dal mio referente unico…"	"al fine di evitare e-mail di personale che non ha RUOLO FORMALE"
89	H	La ha indisposta e indispettita	Lista meccanica di dati ("per non sprecare denaro pubblico")	"al fine di evitare e-mail di personale che non ha nessun RUOLO FORMALE nel procedimento"
90	H	XX potrebbe sentirsi un po’ stupida nell'aver mandato le e-mail precedenti, potrebbe portare anche a delle scuse	il linguaggio tecnico	il distacco o la minor gentilezza rispetto alla precedente	la schematizzazione
91	S	meno irritazione	una forma più formale della mail, ma più dettagliata nel complesso è una mail più chiara.
92	H	La risposta di YY è inattaccabile ed inoltre corredata di tutte le spiegazioni che giustificano tale gestione del lavoro	per non sprecare denaro pubblico
93	H	Di arrabbiatura	tale nominativo è e rimane, per quanto mi riguarda	mi aspetto quindi che ogni comunicazione in merito venga esposta dal mio referente unico
94	H	XX verrà rassicurata e la sua posizione rimesssa a posto dal messaggio YY	tono formale ma competentente, giustamente distaccato senza personalismi	si mostra la giusta decisione e si definisce il limite da non oltrepassare	si danno dati di fatto
95	H	XX saprà che riceverà il sopralluogo richiesto nella segnalazione e le eventuali riparazioni e aggiustamenti delle imprecisioni	per non sprecare denaro pubbliio	i lavori sono sospesi	saranno svolti…ogni verifica quantitativa e qualitativa
96	H	XX sarà innervosito	il fatto che YY non prenda in considerazione le osservazioni di XX solo per un atto formale di assegnazione di ruoli
97	H	Abbasserà la cresta	D.ssa ZZ; Dott. KK	non dovrebbero riguardare comunque i lavori dell'ala B
98	H	Normale prosecusione	l'assenza di sotanziali anomalie nell'esecusione del progetto
99	H	Un conflitto di posizione, viene rimesso al suo posto	i punti chiariscono una scala di valori, da cui è escluso (nessun ruolo formale), viene gratificato per il suo interesse ma non deve intralciare il metodo
100	H	Estraneità formale. Deresponsabilizzazione burocratica	premesso che, nell'ottica…	ogni comunicazione venga esposta al mio referente	provvederò nell'ambito del mio ruolo
101	H	sensazione di trovarsi di fronte a una burocrazia troppo strutturata per essere permeabile a dubbi o critiche	premesso che nell'ottica….denaro pubblico	prima dell'inizio dei lavori……modalità provvisoria	detto ciò ritengo comunque…una volta accertatene l'esistenza
102	H	Una maggiore presa di coscienza del problema ed anche una chiarezza sui ruoli all'interno del lavoro in questione.	L'uso, per esempio, dell'elenco puntato	La comunicazione del referente unico

## Sheet: Final question
ARPA-Firenze * Gruppo ALBERT / Ricerca 2009
N°	PARTE CONCLUSIVA				NOTE
	H / S	Elementi concreti 1	Elementi concreti 2	Elementi concreti 3
1	S	Solo la S esprime interessamento	Il punto esclamativo di XX.XX si ricrede sull'altro:lei è stato davvero gentile(apprezza la forma)e la rispostaesaustiva(e il contenuto)
2	S	Nella risposta XX ringrazia per "l'interessamento e la gentilezza"	Nell'alternativa H ,mancavano l'interesse e la disponibilità di YY ad accogliere le osservazioni di un semplice dipendente senza nessun ruolo attivo stabilito nel procedimento dei lavori in corso.
3	S	"la ringrazio",	"davvero gentile"	"cordiali saluti","!"
4	S	"la ringrazio per questa sua segnalazione"	"proprio per ottimizzare questo suo contributo"
5	S	L'espressione:interessamento	gentile	cordiali saluti
6	H	Brevità della mail	Punto esclamativo
7	S	NR
8	H	premesso che	nell'ottica ecc
9	S	NR
10	S	La speranza che YY non personalizzi la discussione.
11	S	Tonalità data alla lettera	Volontà nel venire a conoscenza di eventuali problematiche causate dai lavori	Volontà nella sua risoluzione
12	S	NR
13	H	Le distanze che vengono prese in tutta la mail
14	S	NR
15	S	"al fine di convogliare più efficaciemente tutte le osservazioni del personale verso il mio ufficio"	"Facilitare la comunicazione" attesta che YY vuole che la comunicazione sia chiara.	"la sua richiesta","rassicurare","la invito a far presenti al più presto tutte le sue osservazioni", si mostra interessato nei confronti dell'interlocutare.
16	S	"Esaustivo"	"Gentile"	"Interessamento"
17	S	Da"da un lato" fino a "saluti"
18	S	La ringrazio per la segnalazione;l'attenzione dei colleghi ci è enormemente utile;per ottimizzare ho chiesto un referente unico	Facilitare la comunicazione;la posso rassicurare	Il procedimento è aperto a verifiche finali; la invito a far presente le osservazioni
19	S	Non vi è una parola o frase che mi porta a dire questo ma è essenzialmente il tono dell'e-mail S che secondo me non può che ottenere una risposta come quella sopra
20	S	Primo paragrafo "la ringrazio..il nostro compito"
21	S	Per quanto non…(non raccoglie segnalazioni) la S non include gli elementi superflui di chiusure …non H che possono "oscurare" il reindirizzamento e rendere "poco credibile il rignraziamento per la segnalazione".
22	S	La ringrazio per l'interessamento e le precisazioni.	Lei è stato gentile e la sua risposta esaustiva
23	S	La ringrazio per questa sua nuova segnalazione e l'attenzione dei colleghi che lavorano con strutture che noi predisponiamo	Ci è enormemente utile per svolgere al meglio il nostro compito.
24	S	Da "proprio per ottimizzare" fino a "questo messaggio".	Da "proprio per" fino a "questo messaggio"
25	H	La mail sembra descrittiva ed esauriente in ogni punto.
26	H	La precisione dettagliata dei vari interventi.
27	H	Tono deciso dell'esposizione, lunghezza del messaggio	Presa di posizione tanto forte da determinare questo tipo di risposta.
28	S	Formulazione del testo.
29	S	La ringrazio della nuova segnalazione	enormemente utile per svolgere il nostro compito.
30	S	Lo stile è più consono ad un rapporto azienda-fornitore di poche e-mail.
31	S	La ringrazio per la segnalazione…	…per svolgere meglio il nostro compito…	…la posso rassicurare…verifica finale…
32	S	L'attenzione dei colleghi che lavorano con le strutture o gli impianti che noi predisponiamo ci è enormemente utile per svolgere al meglio il nostro compito.
33	S	"Davvero gentile"	"Interessamento".
34	H	Siamo nell'ambiente lavorativo.
35	S	La risposta S è sicuramente più confortante e "ammorbidisce" il problema.
36	S	La risposta mette in evidenza toni calmi e gentili.	Lei è stato davvero gentile e la sua risposta esaustiva.
37	H	La risposta può derivare sia dalla mail H che dalla S in quanto la polemica a questo punto non serve per modalità di rispo. Del YY.
38	H	Perché ha dato una risposta concisa, quindi riflette il suo essere alterata.
39	H	XX si rende conte che non è lei la responsabile ma la Dott.ZZ.
40	S	YY è stato esaudiente conciso e gentile.
41	S	Per l'interessamento e le precisazioni.
42	S	Non ci sono elementi precisi, è solo una sensazione.
43	S	NR
44	S	La "S" è più esaustiva e cordiale.
45	S	La risposta risulta più disponibile e gentile.
46	S	La gentilezza e le maniere esaustive appaiono in questo messaggio in maniera chiara ("la posso rassicurare":indicazione della dottoressa ZZ che "conosce" e può "facilitare la comunicazione").
47	S	Lei è stato davvero gentile.
48	H	Il probelma è esplicato più direttamente e dettagliatamente. Forse meno accondiscendente ai reclami di Xxma più concreto ed esaustivo e comunque rassicura XX scrivendo che una volta accertati i problemi saranno risolti.
49	S	Perché YY è stato gentile e disponibile, nonché molto cortese e quindi la risposta è stata altrettanto gentile.
50	S	La supposizione che se fosse stato inviato il messaggio H il contenzioso no n si sarebbe concluso.
51	S	NR
52	S	"interessamento"	"Gentile".	"cordiali saluti",.
53	H	L'elenco delle attività svolte e da svolgere e le precisazioni evidenziano la volontà di dimostrare non solo di aver voluto rispondere ma anche in maniera adeguata.
54	NR	NR
55	S	Tutto.
56	H	NR
57	S	NR
58	S	Nel messaggio H YY mostra di essersi offeso dal messaggio 3,contraccambia con altrettanta aggressività (vedi domanda 3).Nel messaggio S è cortese e il tono con cui si rivolge a XX è più come di qualcuno che è comunque al suo servizio.
59	S	Al tono della risposta che fa riferimento a gentilezza e esaustività. I cordiali saluti (e non più distinti come in precedente). L'omissione di formule formali.	L'inizio del testo senza "convenevoli".
60	S	Lo stile più informale
61	S	"Davvero gentile" mi fa più pensare alla lettera S che è molto più personale
62	H	Poiché la risposta H è più specifica, analitica e precisa
63	S	il referente è la Dott.ssa ZZ…come destinataria in copia di questo messaggio.
64	S	La somma dei messaggi e il modo di relazionarsi di YY.
65	S	La prima (S) era più inerente alle richieste della sig.XX per cui non era una presa di culo come H.
66	S	La ringrazio per l'interessamento , è stato gentile e risposta esaustiva.
67	S	La risposta di XX finale è di chi è calmo e pacato. Sarebbe impossibile rispondere così ad H.
68	H	L'architetto deve comunque mantenere autorità davanti a chi non ha appunto ruolo formale nei procedimenti lavorativi in atto.
69	S	H presupporebbe una risp. diversa.
70	S	Ringraziare sia di YY è la maggiore cortesia anche se pprobabilmente il tutto è solo apparenza
71	S	Tale risposta non potrebbe essere data ad una mail come H
72	S	XX sembra soddisfatto e ringrazia
73	S	H probabilemtne avrebbe avuto risposta non da X ma dalla dott.ZZ
74	h	YY risponde esaurientemente utilizzando un elenco puntato.	"Ritenuto interessante il contenuto della sua segnalazione"	"Provvederò ad una risoluzone dei problemi
75	S	Interessamento, precisazioni	Davvero gentile	Risposta esaustiva
76	S	Il tono conciliante assunto
77	S	Denota più interessamento alla risoluzione del problema e meno distacco e menefreghismo
78	S	La ringrazio	Lei è stato veramente gentile e la sua risposta esaustiva
79	S	Ringrazio	gentile	tono molto pacato
80	S	Davvero gentile
81	S	la referente è la Dott.ssa ZZ	rassicurare: "il procedimento è ancora aperto e le verifiche finali devono essere ancora effettuate"
82	S	La rispsota è più gentile, ma sicuramente non ha risolto i problemi di XX
83	S	E' la cordialità travestita che è ritenuta più funzionale nella gestione dei rapporti
84	S	Lei è stata gratificata dall'attenzione della controparte
85	H
86	S	La gentilezza è presente in tutta la risposta con termini enfatici e tranquillizzanti (enormemente; più cordiali saluti)…	..mentre le spiegazioni sono racchiuse nel terzo paragrafo.
87	H	La ringrazio dell'interessamento..	..e le precisazioni.
88	H
89	S	"la ringrazio per questa nuova segnalazione"	"l'occasione mi è grata per porgerle i più sentiti saluti".
90	H	il linguaggio tecnico	il distacco o la minor gentilezza rispetto alla precedente	la schematizzazione e infine comunque viene ringraziata
91	H	precisione	risposta esaustova
92	H	per non sprecare denaro pubblico appunto
93	S	la ringrazio per questa nuova segnalazione	per quanto la sua richiesta la posso, da un lato, rassicurare	la invito a far presente al più presto tutte le sue osservazioni
94	H	gli stessi (formale ma competente, distacco,giusta decsione….)
95	H	Precisazioni	gentile	risposta esaustiva
96	H	il modo di esporre più esaustivo
97	S	dall'altra la invito	prego di segnalare anche ai suoi colleghi	ma possiamo tenerne conto
98	S	Ringraziamento per segnalazione
99	H	Capisce che non deve più interferire e stare al suo posto! Non scriverà più
100	S	per la sua richiesta la posso rassicurare	il procedimento è ancora aperto
101	S	tono più colloquiale e rassicurante anche se meno diretto. Fornisce minori informazioni ma fondamentali e ben selezionate
102	S	"la ringrazio"	"la rassicuro"	"i più cordiali saluti"
